# Supplementary material
Source: PubMed Central journal article supplement (PMC8842099)
Supplement: ml1c00555_si_001.pdf [file ml1c00555_si_001.pdf]

# Optimization of Brigatinib as New Wild-Type Sparing Inhibitors of EGFR<sup>T790M/C797S</sup> Mutants

Shan Li,<sup>#,a</sup> Tao Zhang,<sup>#,b</sup> Su-Jie Zhu,<sup>#,c</sup> Chong Lei,<sup>d</sup> Mengzhen Lai,<sup>b</sup> Lijie Peng,<sup>a</sup> Linjiang Tong,<sup>b</sup> Zilu Pang,<sup>b</sup> Xiaoyun Lu,<sup>a</sup>  
Jian Ding,<sup>b</sup> Xiaomei Ren,<sup>a,\*</sup> Cai-Hong Yun,<sup>e,\*</sup> Hua Xie,<sup>b,f,\*</sup> Ke Ding<sup>a,d,\*</sup>

<sup>a</sup> International Cooperative Laboratory of Traditional Chinese Medicine Modernization and Innovative Drug Development, Ministry of Education (MOE) of China, Guangzhou City Key Laboratory of Precision Chemical Drug Development, School of Pharmacy, Jinan University, 855 Xingye Avenue East, Guangzhou 511436, China

<sup>b</sup> Division of Antitumor Pharmacology, State Key Laboratory of Drug Research, Shanghai Institute of Materia Medica, Chinese Academy of Sciences, 555 Zuchongzhi Road, Shanghai 201203, China

<sup>c</sup> Institute of Translational Medicine, The Affiliated Hospital of Qingdao University, College of Medicine, Qingdao University, Qingdao 266021, China

<sup>d</sup> State Key Laboratory of Bioorganic and Natural Products Chemistry, Shanghai Institute of Organic Chemistry, Chinese Academy of Sciences, 345 Lingling Road, Shanghai 200032, China

<sup>e</sup> Department of Biochemistry and Biophysics, Institute of Systems Biomedicine, School of Basic Medical Sciences, Peking University Health Science Center, Beijing 100191, China

<sup>f</sup> Zhongshan Institute for Drug Discovery, Shanghai Institute of Materia Medica, Chinese Academy of Sciences, Zhongshan 528400, China

<sup>#</sup> These authors contributed equally to this work.

## Supporting Information

|                                                                               |     |
|-------------------------------------------------------------------------------|-----|
| Table S1. Kinase Inhibition Rate of <b>18k</b> at 100 nM.....                 | S2  |
| EXPERIMENTAL SECTION.....                                                     | S3  |
| General Methods for Chemistry.....                                            | S3  |
| Biological assays.....                                                        | S7  |
| Pharmacokinetic Studies.....                                                  | S8  |
| Protein expression, crystallization and structure determination.....          | S8  |
| Table S2. Co-crystal Structure Data Collection and Refinement Statistics..... | S10 |
| Copies of NMR Spectra and HPLC Purity Data.....                               | S11 |
| References.....                                                               | S33 |

**Table S1. The raw kinase inhibitory rate data of 18k against 28 different kinases at concentration of 100 nM (ELISA assay).**

| Kinase          | Inhibition Rate (%) |         |                 |      |
|-----------------|---------------------|---------|-----------------|------|
|                 | Raw Data            |         | Corrected Data* |      |
|                 | Group 1             | Group 2 | Mean*           | SD*  |
| VEGFR1          | 5.6                 | 7.1     | 6.4             | 1.1  |
| VEGFR2          | -10.3               | 1.5     | 0.8             | 1.1  |
| VEGFR3          | 74.7                | 58.9    | 66.8            | 11.2 |
| PDGFR- $\alpha$ | -5.2                | -14.4   | 0               | 0    |
| PDGFR- $\beta$  | 3.1                 | 28.9    | 16.0            | 18.2 |
| RET             | 36.9                | -1.5    | 18.4            | 26.1 |
| Kit             | 9.4                 | -14.3   | 4.7             | 6.6  |
| Flt-3           | 21.6                | 25      | 23.3            | 2.4  |
| ErbB2           | 20                  | -10     | 10.0            | 14.1 |
| ErbB4           | 26.5                | 40.2    | 33.4            | 9.7  |
| Src             | 27                  | 26.1    | 26.6            | 0.6  |
| Abl             | 10                  | -5.8    | 5.0             | 7.1  |
| EPH-A2          | 7                   | 9.6     | 8.3             | 1.8  |
| EPH-B2          | 10                  | 2.4     | 6.2             | 5.4  |
| ACK1            | 19.4                | 39.8    | 29.6            | 14.4 |
| IGF1R           | 21.5                | 6.4     | 14.0            | 10.7 |
| IR              | 7.1                 | 15.8    | 11.5            | 6.2  |
| FGFR1           | 26.1                | -8.4    | 13.0            | 18.4 |
| FGFR2           | 11.5                | -18.1   | 5.8             | 8.1  |
| FGFR3           | 27                  | 17.2    | 22.1            | 6.9  |
| FGFR4           | 31.4                | 15.5    | 23.5            | 11.2 |
| BTK             | 3.8                 | -7.3    | 1.9             | 2.7  |
| CSF1R           | 22.4                | 10.7    | 16.6            | 8.3  |
| FAK             | 87.7                | 82.1    | 84.9            | 4.0  |
| ITK             | 4.4                 | 2       | 3.2             | 1.7  |
| RON             | 6.4                 | 17.1    | 11.8            | 7.6  |
| ALK             | 0.4                 | 0.7     | 0.6             | 0.2  |
| BLK             | 62                  | 65.8    | 63.9            | 2.7  |

\*To calculate the mean value and SD value, negative data will be corrected to 0.

## EXPERIMENTAL SECTION

### General Methods for Chemistry

All reagents and solvents were purchased from commercial sources and used without further purification. The reactions were monitored by thin-layer chromatography (TLC) on GF254 silica 367 gel coated plates and visualized by UV light visualization (254 nm and 365 nm). Column chromatography was performed using 200-300 mesh silica gel. The  $^1\text{H}$  and  $^{13}\text{C}$  NMR spectra were recorded on a Bruker AV-400 spectrometer at 400 MHz, Bruker AV-500 spectrometer at 125 MHz or Bruker AV-600 spectrometer at 151 MHz using deuterated solvents as internal standard (TMS). Coupling constants ( $J$ ) are expressed in hertz (Hz). Chemical shifts ( $\delta$ ) of NMR are reported in parts per million (ppm) units relative to the internal standard. The high resolution ESI-MS results were recorded on Applied Biosystems Q-STAR Elite ESILC-MS/MS mass spectrometer. Purity of compounds was determined by reverse-phase high-performance liquid chromatography (HPLC) analysis. A flow rate of 1.0 mL/min was used with mobile phase of methanol in water with 0.1% triethylamine (v/v).

**General procedure for the preparation of 20.** To a solution of 2-iodoaniline (**19**, 5.06 g, 23 mmol) in 50 mL DMF was added dimethylphosphine oxide (2.20 g, 27.2 mmol),  $\text{Pd}(\text{OAc})_2$  (0.26 g, 1.2 mmol), xantphos (0.67 g, 1.2 mmol) and  $\text{K}_3\text{PO}_4$  (5.40 g, 25.4 mmol). The suspension was degassed with argon for three times. The reaction mixture was stirred at 120 °C overnight. After cooling down and filtering over Celite, the filtrate was dissolved in ethyl acetate, washed twice with water, dried with saturated brine and  $\text{Na}_2\text{SO}_4$ , and concentrated in *vacuo*. The residue was purified by column chromatography to afford **20** as off-white solid (yield 82%).  $^1\text{H}$  NMR (400 MHz,  $\text{DMSO}-d_6$ )  $\delta$  7.26-7.13 (m, 2H), 6.68-6.61 (m, 1H), 6.59-6.52 (m, 1H), 6.14 (s, 2H), 1.64 (d,  $J = 13.2$  Hz, 6H).

**General procedure for the preparation of 21.** A mixture of intermediate **20** (1.0 eq),  $\text{R}_1$  substituted pyrimidine (1.0 eq),  $\text{K}_2\text{CO}_3$  (1.2 eq) and  $n\text{-Bu}_4\text{NHSO}_4$  (0.1 eq) in DMF was heated up to 65 °C and stirred overnight. Upon cooling, the solution was evaporated and purified by column chromatography to get the desired compound **21**.

(2-((2,5-Dichloropyrimidin-4-yl)amino)phenyl)dimethylphosphine oxide (**21a**) White solid, yield 84%.  $^1\text{H}$  NMR (400 MHz,  $\text{DMSO}-d_6$ )  $\delta$  11.83 (s, 1H), 8.46 (s, 1H), 8.43 (dd,  $J = 8.3$  Hz, 4.2 Hz, 1H), 7.71-7.56 (m, 2H), 7.31-7.21 (m, 1H), 1.83 (s, 3H), 1.80 (s, 3H).

(2-((5-Bromo-2-chloropyrimidin-4-yl)amino)phenyl)dimethylphosphine oxide (**21g**) Off-white solid, yield 71%.  $^1\text{H}$  NMR (400 MHz,  $\text{CDCl}_3$ )  $\delta$  11.27 (s, 1H), 8.56 (dd,  $J = 8.5$ , 4.4 Hz, 1H), 8.33 (s, 1H), 7.59 (dd,  $J = 8.5$ , 7.4 Hz, 1H), 7.37-7.26 (m, 1H), 7.22-7.11 (m, 1H), 1.84 (d,  $J = 13.2$  Hz, 6H).

(2-((2-Chloro-5-(trifluoromethyl)pyrimidin-4-yl)amino)phenyl)dimethylphosphine oxide (**21h**) Off-white solid, yield 63%.  $^1\text{H}$  NMR (400 MHz,  $\text{CDCl}_3$ )  $\delta$  11.68 (s, 1H), 8.64 (dd,  $J = 8.4$ , 4.4 Hz, 1H), 8.59 (s, 1H), 7.56 (dd,  $J = 8.5$ , 7.3 Hz, 1H), 7.33-7.33 (m, 1H), 7.20-7.09 (m, 1H), 1.84 (d,  $J = 13.2$  Hz, 6H).

**General procedure for the preparation of compounds 18.**  $\text{R}_2$  substituted aniline was commercially available from several sources, which could also be conveniently

prepared by successively undergoing nucleophilic substitution reaction of 4-fluoronitrobenzene with aliphatic amine and nitro reduction reaction mediated by iron powder. To a solution of **21** (1.1 eq) and R<sub>2</sub> substituted aniline (1.0 eq) in 2-methoxyethanol was added 2.5 M HCl in ethanol (2.5 eq). The resulting mixture was heated at 120 °C overnight in a sealed tube under stirring. Upon cooling, the reaction mixture was evaporated, and purified by column chromatography to yield the target compound **18**.

(2-((5-Chloro-2-((3-methoxy-4-(4-(4-methylpiperazin-1-yl)piperidin-1-yl)phenyl)amino)pyrimidin-4-yl)amino)phenyl)dimethylphosphine oxide (**18a**) Yield 66%. <sup>1</sup>H NMR (400 MHz, CDCl<sub>3</sub>) δ 10.89 (s, 1H), 8.61 (dd, *J* = 8.4, 4.4 Hz, 1H), 8.07 (s, 1H), 7.41 (t, *J* = 7.8 Hz, 1H), 7.32-7.22 (m, 1H), 7.13-6.96 (m, 4H), 6.87 (d, *J* = 8.5 Hz, 1H), 3.74 (s, 3H), 3.51 (t, *J* = 16.4 Hz, 2H), 2.73-2.35 (m, 10H), 2.33-2.08 (m, 5H), 1.90-1.76 (m, 9H). <sup>13</sup>C NMR (101 MHz, CDCl<sub>3</sub>) δ 157.91 (s), 155.93 (s), 154.86 (s), 152.53 (s), 143.85 (d, *J* = 2.6 Hz), 137.55 (s), 134.74 (s), 132.47 (d, *J* = 2.0 Hz), 129.56 (d, *J* = 11.2 Hz), 122.66 (d, *J* = 7.1 Hz), 122.42 (d, *J* = 12.1 Hz), 119.93 (d, *J* = 95.7 Hz), 118.34 (s), 112.81 (s), 106.50 (s), 105.13 (s), 61.94 (s), 55.50 (s), 51.27 (s), 48.83 (s), 46.03 (s), 28.36 (s), 18.63 (d, *J* = 71.6 Hz), 1.02 (s). HRMS (ESI) for C<sub>29</sub>H<sub>40</sub>ClN<sub>7</sub>O<sub>2</sub>P [M + H]<sup>+</sup>, calcd: 584.2664; found 584.2658. HPLC analysis: MeOH-H<sub>2</sub>O (80:20), RT = 6.12 min, 98.8% purity.

(2-((5-Chloro-2-((3-methyl-4-(4-(4-methylpiperazin-1-yl)piperidin-1-yl)phenyl)amino)pyrimidin-4-yl)amino)phenyl)dimethylphosphine oxide (**18b**) Yield 61%. <sup>1</sup>H NMR (400 MHz, CDCl<sub>3</sub>) δ 10.89 (s, 1H), 8.62 (dd, *J* = 8.4, 4.4 Hz, 1H), 8.07 (s, 1H), 7.44 (t, *J* = 7.9 Hz, 1H), 7.36-7.27 (m, 3H), 7.14-7.05 (m, 1H), 6.96 (d, *J* = 8.4 Hz, 1H), 6.80 (s, 1H), 3.14 (d, *J* = 11.9 Hz, 2H), 2.86-2.38 (m, 10H), 2.37-2.29 (m, 4H), 2.27 (s, 3H), 2.00-1.90 (m, 2H), 1.83 (d, *J* = 13.1 Hz, 6H), 1.78-1.69 (m, 2H). <sup>13</sup>C NMR (101 MHz, CDCl<sub>3</sub>) δ 157.79 (s), 155.88 (s), 154.59 (s), 147.38 (s), 143.31 (d, *J* = 2.5 Hz), 134.38 (s), 133.28 (s), 132.59 (d, *J* = 2.0 Hz), 129.60 (d, *J* = 11.2 Hz), 123.12 (s), 123.01 (d, *J* = 6.9 Hz), 122.72 (d, *J* = 12.5 Hz), 120.11 (d, *J* = 96.5 Hz), 119.15 (s), 118.72 (s), 105.83 (s), 61.86 (s), 54.97 (s), 52.11 (s), 48.79 (s), 45.68 (s), 28.90 (s), 18.18 (d, *J* = 71.7 Hz), 17.80 (s). HRMS (ESI) for C<sub>29</sub>H<sub>40</sub>ClN<sub>7</sub>OP [M + H]<sup>+</sup>, calcd: 568.2715; found 568.2711. HPLC analysis: MeOH-H<sub>2</sub>O (80:20), RT = 9.93 min, 98.6% purity.

(2-((5-Chloro-2-((4-(4-(4-methylpiperazin-1-yl)piperidin-1-yl)-3-(trifluoromethoxy)phenyl)amino)pyrimidin-4-yl)amino)phenyl)dimethylphosphine oxide (**18c**) Yield 52%. <sup>1</sup>H NMR (400 MHz, CDCl<sub>3</sub>) δ 10.87 (s, 1H), 8.51 (dd, *J* = 8.4, 4.4 Hz, 1H), 8.09 (s, 1H), 7.55-7.44 (m, 2H), 7.33-7.26 (m, 2H), 7.13 (td, *J* = 7.4, 1.4 Hz, 1H), 6.95 (d, *J* = 8.7 Hz, 1H), 6.84 (s, 1H), 3.38 (d, *J* = 11.8 Hz, 2H), 2.96-2.33 (m, 10H), 2.36-2.23 (m, 4H), 1.94 (d, *J* = 11.4 Hz, 2H), 1.83 (d, *J* = 13.2 Hz, 6H), 1.77-1.68 (m, 2H). <sup>13</sup>C NMR (101 MHz, CDCl<sub>3</sub>) δ 157.50 (s), 156.02 (s), 154.78 (s), 143.56 (d, *J* = 2.6 Hz), 142.39 (d, *J* = 1.5 Hz), 140.84 (s), 134.47 (s), 132.49 (s), 129.56 (d, *J* = 11.1 Hz), 122.83 (d, *J* = 7.4 Hz), 122.72 (d, *J* = 12.3 Hz), 120.49 (q, *J* = 257.5 Hz), 120.36 (d, *J* = 95.6 Hz), 120.17 (s), 119.00 (s), 114.59 (s), 106.94 (s), 61.74 (s), 55.45 (s), 51.25 (s), 49.18 (s), 46.02 (s), 28.88 (s), 18.56 (d, *J* = 71.6 Hz). HRMS (ESI) for C<sub>29</sub>H<sub>37</sub>ClF<sub>3</sub>N<sub>7</sub>O<sub>2</sub>P [M + H]<sup>+</sup>, calcd: 638.2381; found 638.2377. HPLC analysis: MeOH-

H<sub>2</sub>O (80:20), RT = 11.82 min, 99.3% purity.

(2-((5-Chloro-2-((4-(4-(4-methylpiperazin-1-yl)piperidin-1-yl)-3-(trifluoromethyl)phenyl)amino)pyrimidin-4-yl)amino)phenyl)dimethylphosphine oxide (**18d**) Yield 71%. <sup>1</sup>H NMR (400 MHz, CDCl<sub>3</sub>) δ 10.96 (s, 1H), 8.53 (dd, *J* = 8.4, 4.4 Hz, 1H), 8.10 (s, 1H), 7.75 (d, *J* = 2.5 Hz, 1H), 7.67 (dd, *J* = 8.6, 2.4 Hz, 1H), 7.45 (t, *J* = 7.9 Hz, 1H), 7.33-7.27 (m, 2H), 7.16-7.08 (m, 1H), 6.96 (s, 1H), 3.07 (d, *J* = 11.4 Hz, 2H), 2.86-2.31 (m, 11H), 2.30 (s, 3H), 1.98-1.87 (m, 2H), 1.85 (s, 3H), 1.82 (s, 3H), 1.78-1.70 (m, 2H). <sup>13</sup>C NMR (101 MHz, CDCl<sub>3</sub>) δ 157.38 (s), 156.02 (s), 154.77 (s), 147.60 (s), 143.56 (d, *J* = 2.7 Hz), 136.24 (s), 132.55 (d, *J* = 2.2 Hz), 129.61 (d, *J* = 10.9 Hz), 127.75 (q, *J* = 28.5 Hz), 124.38 (s), 123.94 (s), 123.77 (q, *J* = 273.6 Hz), 122.70 (d, *J* = 12.2 Hz), 122.55 (d, *J* = 7.0 Hz), 120.11 (d, *J* = 95.6 Hz), 118.59 (q, *J* = 6.3 Hz), 107.27 (s), 61.78 (s), 55.48 (s), 53.86 (s), 49.17 (s), 46.02 (s), 29.01 (s), 18.63 (d, *J* = 71.6 Hz). HRMS (ESI) for C<sub>29</sub>H<sub>37</sub>ClF<sub>3</sub>N<sub>7</sub>OP [M + H]<sup>+</sup>, calcd: 622.2432; found 622.2431. HPLC analysis: MeOH-H<sub>2</sub>O (80:20), RT = 10.72 min, 98.6% purity.

(2-((5-Chloro-2-((3-(difluoromethyl)-4-(4-(4-methylpiperazin-1-yl)piperidin-1-yl)phenyl)amino)pyrimidin-4-yl)amino)phenyl)dimethylphosphine oxide (**18e**) Yield 46%. <sup>1</sup>H NMR (400 MHz, CD<sub>3</sub>OD) δ 8.44 (dd, *J* = 8.3, 4.5 Hz, 1H), 8.10 (s, 1H), 7.73 (d, *J* = 2.3 Hz, 1H), 7.66 (dd, *J* = 8.7, 2.4 Hz, 1H), 7.64-7.57 (m, 1H), 7.54 (d, *J* = 8.3 Hz, 1H), 7.26 (td, *J* = 7.5, 1.3 Hz, 1H), 7.19 (s, 1H), 7.04 (t, *J* = 51.6 Hz, 1H), 3.10 (d, *J* = 11.6 Hz, 2H), 3.00-2.17 (m, 14H), 1.99 (d, *J* = 11.8 Hz, 2H), 1.85 (d, *J* = 13.5 Hz, 6H), 1.70 (qd, *J* = 12.0, 3.7 Hz, 2H). HRMS (ESI) for C<sub>29</sub>H<sub>38</sub>ClF<sub>2</sub>N<sub>7</sub>OP [M + H]<sup>+</sup>, calcd: 604.2527; found 604.2525. HPLC analysis: MeOH-H<sub>2</sub>O (80:20), RT = 8.83 min, 99.1% purity.

(2-((5-Chloro-2-((3-chloro-4-(4-(4-methylpiperazin-1-yl)piperidin-1-yl)phenyl)amino)pyrimidin-4-yl)amino)phenyl)dimethylphosphine oxide (**18f**) Yield 58%. <sup>1</sup>H NMR (400 MHz, CDCl<sub>3</sub>) δ 10.94 (s, 1H), 8.58 (dd, *J* = 8.4, 4.4 Hz, 1H), 8.08 (s, 1H), 7.76 (d, *J* = 2.5 Hz, 1H), 7.55 (t, *J* = 7.9 Hz, 1H), 7.33-7.28 (m, 1H), 7.21 (dd, *J* = 8.6, 2.5 Hz, 1H), 7.16-7.08 (m, 1H), 6.98 (d, *J* = 8.7 Hz, 1H), 6.84 (s, 1H), 3.40 (d, *J* = 11.7 Hz, 2H), 2.84-2.46 (m, 9H), 2.46-2.37 (s, 1H), 2.33 (s, 3H), 2.05-1.89 (m, 3H), 1.84 (d, *J* = 13.1 Hz, 6H), 1.81-1.73 (m, 2H). <sup>13</sup>C NMR (101 MHz, CDCl<sub>3</sub>) δ 157.36 (s), 155.91 (s), 154.60 (s), 144.65 (s), 143.14 (d, *J* = 2.2 Hz), 135.13 (s), 133.02 (s), 129.63 (d, *J* = 10.8 Hz), 129.02 (s), 122.91 (d, *J* = 2.5 Hz), 122.82 (d, *J* = 2.6 Hz), 122.08 (s), 120.34 (s), 120.16 (d, *J* = 96.4 Hz), 119.10 (s), 106.44 (s), 61.75 (s), 54.98 (s), 51.65 (s), 48.63 (s), 45.66 (s), 28.43 (s), 18.28 (d, *J* = 71.7 Hz). HRMS (ESI) for C<sub>28</sub>H<sub>37</sub>Cl<sub>2</sub>N<sub>7</sub>OP [M + H]<sup>+</sup>, calcd: 588.2169; found 588.2166. HPLC analysis: MeOH-H<sub>2</sub>O (80:20), RT = 9.37 min, 99.2% purity.

(2-((5-Bromo-2-((3-chloro-4-(4-(4-methylpiperazin-1-yl)piperidin-1-yl)phenyl)amino)pyrimidin-4-yl)amino)phenyl)dimethylphosphine oxide (**18g**) Yield 55%. <sup>1</sup>H NMR (400 MHz, CDCl<sub>3</sub>) δ 10.71 (s, 1H), 8.49 (dd, *J* = 8.4, 4.3 Hz, 1H), 8.21 (s, 1H), 7.76 (d, *J* = 2.5 Hz, 1H), 7.57 (t, *J* = 7.9 Hz, 1H), 7.37-7.29 (m, 1H), 7.23 (dd, *J* = 8.6, 2.5 Hz, 1H), 7.16 (td, *J* = 7.4, 1.5 Hz, 1H), 6.99 (d, *J* = 8.7 Hz, 1H), 6.87 (s, 1H), 3.41 (d, *J* = 11.8 Hz, 2H), 2.99-2.19 (m, 14H), 1.95 (d, *J* = 11.7 Hz, 2H), 1.90-1.74 (m, 8H). <sup>13</sup>C NMR (151 MHz, CDCl<sub>3</sub>) δ 157.74 (s), 157.58 (s), 156.64 (s), 144.56 (s), 142.97 (d, *J* = 2.2 Hz), 135.05 (s), 132.97 (s), 129.61 (d, *J* = 10.9 Hz), 128.98 (s), 123.27

(d,  $J = 7.2$  Hz), 123.08 (d,  $J = 12.2$  Hz), 121.93 (s), 120.57 (d,  $J = 96.5$  Hz), 120.31 (s), 118.98 (s), 94.87 (s), 61.71 (s), 54.98 (s), 51.67 (s), 48.67 (s), 45.75 (s), 28.39 (s), 18.16 (d,  $J = 71.7$  Hz). HRMS (ESI) for  $C_{28}H_{37}BrClN_7OP$   $[M + H]^+$ , calcd: 632.1664; found 632.1662. HPLC analysis: MeOH-H<sub>2</sub>O (80:20), RT = 9.53 min, 99.2% purity.

(2-((2-((3-Chloro-4-(4-(4-methylpiperazin-1-yl)piperidin-1-yl)phenyl)amino)-5-(trifluoromethyl)pyrimidin-4-yl)amino)phenyl)dimethylphosphine oxide (**18h**) Yield 37%. <sup>1</sup>H NMR (400 MHz, CDCl<sub>3</sub>)  $\delta$  11.01 (s, 1H), 8.41 (dd,  $J = 8.4, 4.4$  Hz, 1H), 8.33 (s, 1H), 7.60 (d,  $J = 2.3$  Hz, 1H), 7.41-7.30 (m, 2H), 7.25-7.14 (m, 1H), 7.11-6.97 (m, 2H), 6.75 (s, 1H), 3.45 (d,  $J = 11.8$  Hz, 2H), 2.97-2.27 (m, 14H), 1.96 (d,  $J = 13.0$  Hz, 2H), 1.85-1.78 (m, 8H). HRMS (ESI) for  $C_{29}H_{37}ClF_3N_7OP$   $[M + H]^+$ , calcd: 622.2432; found 622.2424. HPLC analysis: MeOH-H<sub>2</sub>O (80:20), RT = 10.29 min, 99.0% purity.

(2-((5-Chloro-2-((5-methyl-6-(4-(4-methylpiperazin-1-yl)piperidin-1-yl)pyridin-3-yl)amino)pyrimidin-4-yl)amino)phenyl)dimethylphosphine oxide (**18i**) Yield 67%. <sup>1</sup>H NMR (400 MHz, CD<sub>3</sub>OD)  $\delta$  8.45-8.35 (m, 1H), 8.18 (d,  $J = 2.5$  Hz, 1H), 8.08 (s, 1H), 7.84 (d,  $J = 2.5$  Hz, 1H), 7.62 (ddd,  $J = 14.1, 7.7, 1.4$  Hz, 1H), 7.54 (t,  $J = 7.9$  Hz, 1H), 7.32-7.20 (m, 1H), 3.39 (d,  $J = 12.4$  Hz, 2H), 3.09-2.65 (m, 9H), 2.64-2.32 (m, 5H), 2.22 (s, 3H), 2.08-1.93 (m, 2H), 1.87 (s, 3H), 1.83 (s, 3H), 1.76-1.65 (m, 2H). <sup>13</sup>C NMR (101 MHz, CDCl<sub>3</sub>)  $\delta$  157.84 (s), 157.66 (s), 156.00 (s), 154.83 (s), 143.74 (d,  $J = 2.6$  Hz), 137.53 (s), 132.46 (d,  $J = 2.2$  Hz), 132.08 (s), 131.30 (s), 129.64 (d,  $J = 11.0$  Hz), 125.28 (s), 122.57 (d,  $J = 5.0$  Hz), 122.48 (s), 120.08 (d,  $J = 95.5$  Hz), 106.92 (s), 62.17 (s), 54.54 (s), 49.65 (s), 48.27 (s), 45.29 (s), 28.43 (s), 18.67 (d,  $J = 71.7$  Hz), 18.17 (s). HRMS (ESI) for  $C_{28}H_{39}ClN_8OP$   $[M + H]^+$ , calcd: 569.2667; found 569.2662. HPLC analysis: MeOH-H<sub>2</sub>O (80:20), RT = 5.77 min, 92.1% purity.

(2-((5-Chloro-2-((3,5-dichloro-4-(4-(4-methylpiperazin-1-yl)piperidin-1-yl)phenyl)amino)pyrimidin-4-yl)amino)phenyl)dimethylphosphine oxide (**18j**) Yield 50%. <sup>1</sup>H NMR (400 MHz, CDCl<sub>3</sub>)  $\delta$  10.96 (s, 1H), 8.52 (dd,  $J = 8.4, 4.4$  Hz, 1H), 8.10 (s, 1H), 7.67-7.48 (m, 2H), 7.44 (d,  $J = 2.3$  Hz, 1H), 7.35-7.26 (m, 1H), 7.14 (t,  $J = 6.7$  Hz, 1H), 6.90 (s, 1H), 3.34 (t,  $J = 11.1$  Hz, 2H), 3.03 (d,  $J = 11.8$  Hz, 2H), 2.90-2.25 (m, 11H), 2.09-1.92 (m, 1H), 1.95-1.69 (m, 10H). <sup>13</sup>C NMR (101 MHz, CDCl<sub>3</sub>)  $\delta$  156.96 (s), 156.02 (s), 154.78 (s), 143.46 (d,  $J = 2.6$  Hz), 140.12 (s), 137.07 (s), 136.02 (s), 134.63 (s), 133.12 (s), 129.68 (d,  $J = 10.9$  Hz), 122.75 (d,  $J = 12.2$  Hz), 122.52 (d,  $J = 7.1$  Hz), 120.24 (d,  $J = 95.6$  Hz), 119.71 (s), 119.19 (s), 107.56 (s), 62.14 (s), 55.54 (s), 49.72 (s), 49.11 (s), 46.06 (s), 29.37 (s), 18.65 (d,  $J = 71.6$  Hz). HRMS (ESI) for  $C_{28}H_{36}Cl_3N_7OP$   $[M + H]^+$ , calcd: 622.1779; found 622.1782. HPLC analysis: MeOH-H<sub>2</sub>O (80:20), RT = 22.15 min, 100% purity.

(2-((5-Chloro-2-((2,5-dichloro-4-(4-(4-methylpiperazin-1-yl)piperidin-1-yl)phenyl)amino)pyrimidin-4-yl)amino)phenyl)dimethylphosphine oxide (**18k**) Yield 57%. <sup>1</sup>H NMR (400 MHz, CDCl<sub>3</sub>)  $\delta$  11.00 (s, 1H), 8.56 (dd,  $J = 8.1, 4.3$  Hz, 1H), 8.41 (s, 1H), 8.15 (s, 1H), 7.61 (dd,  $J = 8.5, 7.4$  Hz, 1H), 7.36-7.30 (m, 1H), 7.23 (s, 1H), 7.21-7.11 (m, 1H), 7.08 (s, 1H), 3.41 (d,  $J = 11.9$  Hz, 2H), 2.79-2.30 (m, 14H), 1.96 (d,  $J = 11.9$  Hz, 2H), 1.90-1.72 (m, 8H). <sup>13</sup>C NMR (101 MHz, CDCl<sub>3</sub>)  $\delta$  156.92 (s), 155.99 (s), 154.85 (s), 144.75 (s), 143.48 (d,  $J = 2.6$  Hz), 133.19 (d,  $J = 2.1$  Hz), 131.70 (s), 129.64 (d,  $J = 10.9$  Hz), 127.60 (s), 122.67 (d,  $J = 12.2$  Hz), 122.45 (s), 122.42 (d,  $J = 6.7$  Hz), 121.38 (s), 120.89 (s), 120.11 (d,  $J = 95.5$  Hz), 107.58 (s), 61.54 (s), 55.45 (s),

51.63 (s), 49.02 (s), 46.00 (s), 28.55 (s), 18.64 (d,  $J = 71.6$  Hz). HRMS (ESI) for  $C_{28}H_{36}Cl_3N_7OP [M + H]^+$ , calcd: 622.1779; found 622.1782. HPLC analysis: MeOH-H<sub>2</sub>O (80:20), RT = 19.50 min, 96.8% purity.

## Biological assays

### *Cell culture.*

BaF3 cell line was obtained from DSMZ (Deutsche Sammlung von Mikroorganismen und Zellkulturen), and cultured in RPMI1640 containing 10% FBS and 10 ng/mL IL3. BaF3-EGFR<sup>L858R/T790M/C797S</sup> and BaF3-EGFR<sup>19Del/T790M/C797S</sup> cells were built by Jian Ding's laboratory and cultured in RPMI1640 with 10% FBS without IL3. NCI-H1975, PC9 lung cancer cell lines were purchased from ATCC (American type culture collection) or ECACC (European Collection of Authenticated Cell Cultures), respectively. PC9-EGFR<sup>T790M/C797S</sup> cell line was constructed using CRISPR knock-in technology. Tumor cells were cultured in standard culture medium and all cell lines were maintained at 37 °C in 5% CO<sub>2</sub> incubator.

### *Compounds and antibodies.*

Osimertinib (#T2490) was purchased from Topscience. Brigatinib (#S8229) was obtained from Selleck. Antidodies phospho-EGFR (Tyr1068; #3777), EGFR (#4267), p-AKT (Ser473, #4060) and AKT (#9272S) were purchased from Cell Signaling Technologies and  $\beta$ -actin (#P60709) was purchased from Abgent.

### *In Vitro Kinase Assay.*

EGFR<sup>WT</sup> and EGFR<sup>L858R/T790M</sup> kinase proteins were purchased from Eurofins Scientific. EGFR<sup>L858R/T790M/C797S</sup> kinase was purchased from BPS Bioscience. Kinase inhibition activities of compounds were evaluated using an enzyme-linked-immunosorbent assay (ELISA) according to the standard procedures as previously described<sup>1</sup>. Absorbance was measured at 492 nm using a multi-well spectrophotometer (VERSAmax™). The inhibitory rate (%) was calculated with the formula  $[1 - (A_{492} \text{ treated}/A_{492} \text{ control})] \times 100\%$ . IC<sub>50</sub> values were calculated by SoftMax Pro from inhibitory curves.

### *Cellular Proliferation Assays.*

CCK-8 (Cell Counting Kit-8, ) assay: Cells were cultured in 96-well plates overnight and treated with indicated concentration of compounds for 72 h. 10  $\mu$ L of CCK-8 solution (#AC11L057, Life iLab) was added to each well and incubated with cells for 1-2 h, then the absorbance was measured using a multiwell spectrophotometer (VERSAmax™) at 450 nm. The growth inhibition rate (%) was calculated as  $[1 - (A_{450} \text{ treated}/A_{450} \text{ control})] \times 100\%$  and IC<sub>50</sub> values were determined using Logit method. SRB assay: H1299 cells were plated in a 96-well culture plate and cultured overnight. The test compounds in different concentrations were added, and then the cells were cultured for 72 hours. Then, sulforhodamine B (SRB, #S9012, Sigma-Aldrich) assay was performed according to standard protocols, and the results were acquired using a multiwell spectrophotometer (VERSA max™, Molecular Devices) at an absorbance of 560 nm.

### *Western Blot Analysis.*

Cells were cultured in 12-well plates and starved in serum-free RPMI1640 for 20 h. Then cells were treated with indicated compounds or DMSO control for 2 h and

stimulated with 50 ng/ml EGF during the last 15 minutes. The cells were washed with cold PBS for 3 times, and then lysed in SDS lysis buffer and heated for 30 min at 100 °C for the following Western Blot analysis. Cell lysis were loaded on SDS-PAGE gels, then target proteins were separated and transferred from gels to nitrocellulose membranes. After blocked in a 5% non-fat milk-TBST for 40 minutes, the membranes were incubated in primary antibody diluent overnight at 4 °C. Then the membranes were washed with TBST for 3 times (5 min per wash) and incubated with diluted secondary antibody for 60 minutes at room temperature. After washed with TBST for 3 times, target proteins in membranes were analyzed by chemiluminescence using Amersham Imager 600.

### Pharmacokinetic Studies

The pharmacokinetic study was carried out by Shanghai Medicilon Inc., according to the protocols and guidelines of the institutional care and use committee. All the procedures related to animal handling, care, and treatment in this article were performed in compliance with Agreement of the Ethics Committee on Laboratory Animal Care and the Guidelines for the Care and Use of Laboratory Animals in Shanghai, China. Compound **18f** and **18k** were dissolved in mixed solvents PEG300/EtOH/NaCl (40/10/50, v/v/v) for intravenous injection and 0.5% HPMC for oral administration. SD rats (male, 3 animals per group) were fasted for 12 h before administration and remained fasting for 2 hours. After intravenous injection (0.5 mg/kg) or oral administration (3 mg/kg) of **18f** or **18k**, blood would be taken *via* jugular vein or other suitable vein, 0.2 mL/time point. Blood samples were placed in tubes containing K2-EDTA and stored on ice until centrifuged. The blood samples were centrifuged at 6800 g/min for 6 minutes at 2-8 °C within 1h after collected and stored frozen at approximately -80 °C until further use. The analytical results were confirmed using quality control samples for intra-assay variation. The accuracy of >66.7% of the quality control samples should be between 80-120% of the known value(s). Standard set of parameters including Area Under the Curve ( $AUC_{(0-t)}$  and  $AUC_{(0-\infty)}$ ), elimination half-life ( $T_{1/2}$ ), maximum plasma concentration ( $C_{max}$ ), time to reach maximum plasma concentration ( $T_{max}$ ) will be calculated using noncompartmental analysis modules in FDA certified pharmacokinetic program Phoenix WinNonlin 7.0 (Pharsight, USA) by the Study Director.

### Protein expression, crystallization and structure determination

Constructs spanning residues 696-1022 of the mutant human EGFR<sup>T790M/C797S</sup> were expressed and purified using the baculovirus/insect cell system as described<sup>2</sup>. To improve the resolution of the crystals, we introduced three A-loop mutations E865A/E866A/K867A to the construct as in the previous report<sup>3</sup>. Crystals used in this study were prepared by hanging drop vapor diffusion. For co-crystallization, the compound **18f** was added to 7.0 mg/mL proteins to a final concentration of 1mM and incubated at 4 °C for two hours before setting up the crystallization tray. The reservoir solutions to grow crystals were 0.1 M HEPES pH 7.8, 40% PEG400, 0.15 M NaCl, 5 mM tris(2-carboxyethyl)-phosphine (TCEP). The diffraction data were collected on



beamline BL18U1 at Shanghai Synchrotron Radiation Facility (SSRF). The diffraction data were processed using HKL3000<sup>4</sup>. The structures were all solved by molecular replacement with Phenix<sup>5</sup> using the previously determined EGFR 696-1022 T790M/C797S in complex with D3003 (PDB 5ZTO) as the search model. Repeated rounds of manual refitting and crystallographic refinement were then performed using COOT<sup>6</sup> and Phenix. The inhibitor was modeled into the closely fitting positive Fo-Fc electron density and included in following refinement cycles. Topology and parameter files for the inhibitor were generated using Phenix. The diffraction data collection and refinement statistics were summarized in Supplemental Table S2.

**Table S2. Co-crystal structure data collection and refinement statistics**

|                                     | TMCS_18f                |
|-------------------------------------|-------------------------|
| <b>PDB ID</b>                       | <b>7ER2</b>             |
| <b>Data collection*</b>             |                         |
| Space group                         | I23                     |
| Cell dimensions                     |                         |
| <i>a, b, c</i> (Å)                  | 145.93, 145.93, 145.93, |
| $\alpha, \beta, \gamma$ (°)         | 90.0,90.0,90.0          |
| Resolution (Å)                      | 50.0-2.65(2.74-2.65)    |
| $R_{\text{pim}}$                    | 0.056(0.541)            |
| $I/\sigma I$                        | 21(2.5)                 |
| Completeness (%)                    | 100(100)                |
| Redundancy                          | 36.8(27.2)              |
| <b>Refinement</b>                   |                         |
| Resolution (Å)                      | 28.62-2.65              |
| No. reflections                     | 14931                   |
| $R_{\text{work}} / R_{\text{free}}$ | 0.195/0.242             |
| No. atoms                           |                         |
| Protein                             | 2269                    |
| Ligand/ion                          | 39                      |
| Water                               | 16                      |
| <i>B</i> -factors                   |                         |
| Protein                             | 57.1                    |
| Ligand/ion                          | 71.13                   |
| Water                               | 58.49                   |
| R.m.s. deviations                   |                         |
| Bond lengths (Å)                    | 0.008                   |
| Bond angles (°)                     | 1.024                   |
| Ramachandran Plot                   |                         |
| Favored region (%)                  | 98.2                    |
| Allowed region (%)                  | 1.8                     |
| Outliers (%)                        | 0.0                     |

\* Values in parentheses are for highest-resolution shell.

# Copies of NMR Spectra and HPLC Purity Data

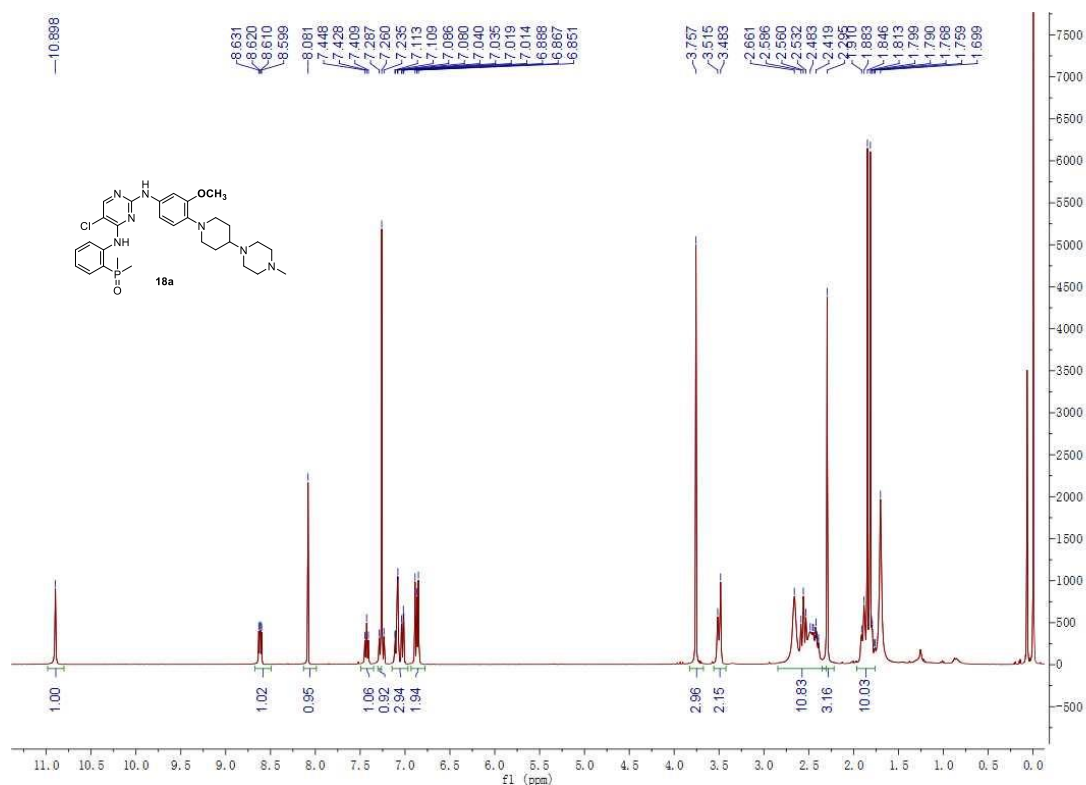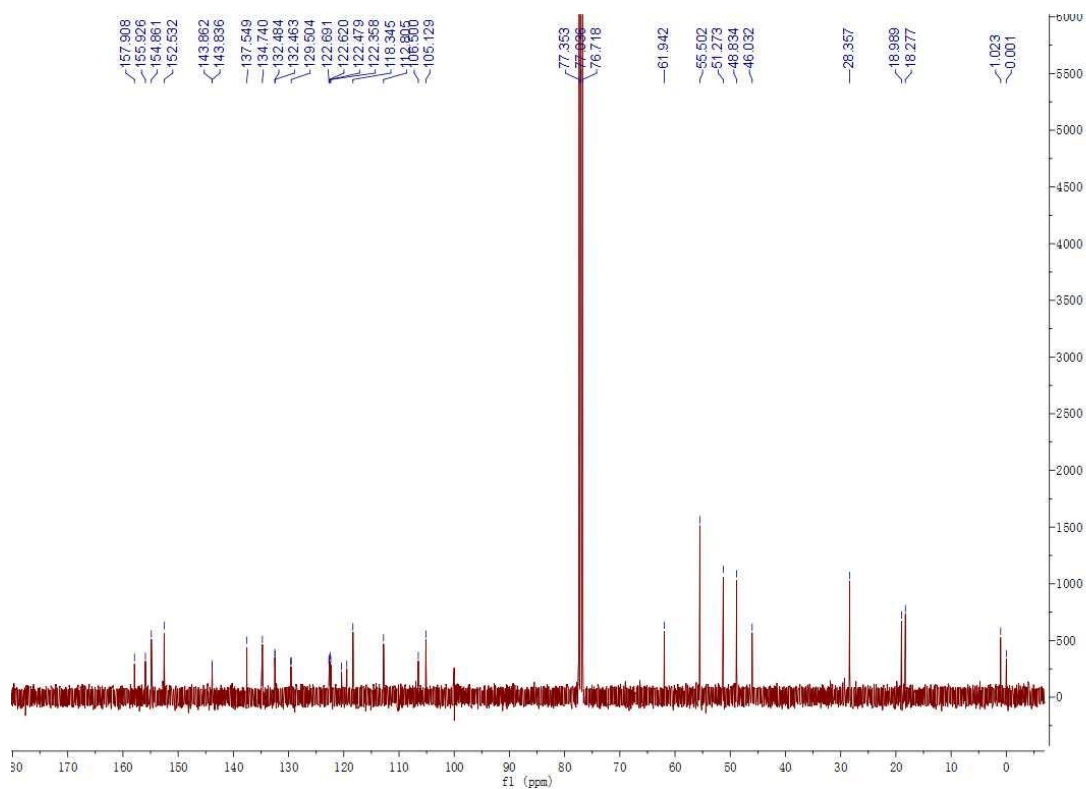

```

=====
Acq. Operator   : 系统
Sample Operator  : 系统
Acq. Instrument : 1260LC
Location        : 1
Injection Date  : 27/01/2021 08:52:45
Inj Volume     : 10.000 µl
Acq. Method    : E:\DK\TL\方法75C-25A-30min-1u.M
Last changed   : 26/01/2021 10:20:57 by 系统
Analysis Method: E:\DK\TL\方法80C-20A-30min-1u.M
Last changed   : 06/04/2021 10:23:35 by 系统

```

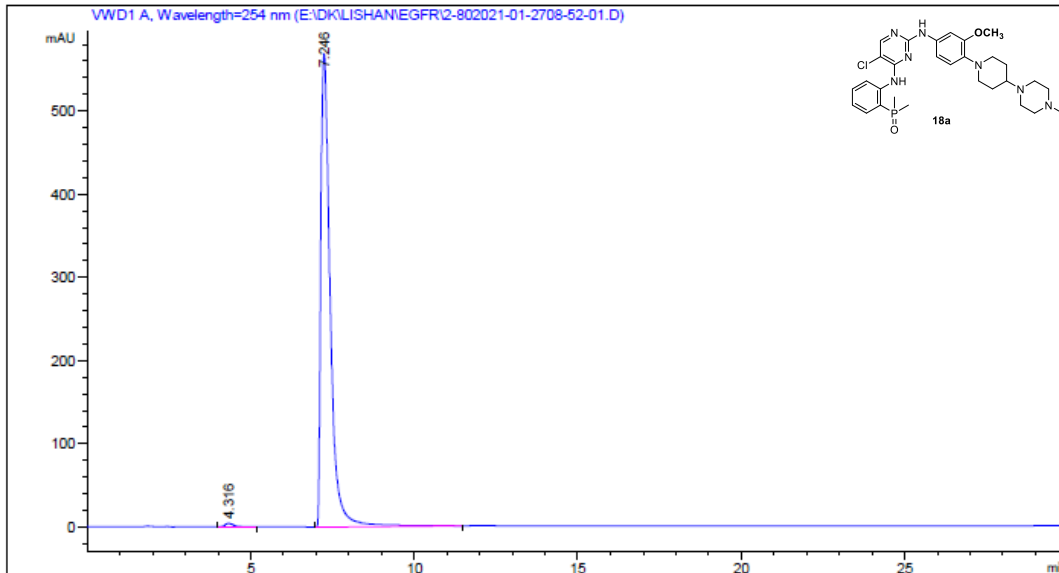

=====  
Area Percent Report  
=====

```

Sorted By      : Signal
Multiplier     : 1.0000
Dilution       : 1.0000
Sample Amount  : 20.00000 [ng/ul] (not used in calc.)
Use Multiplier & Dilution Factor with ISTDs

```

Signal 1: VWD1 A, Wavelength=254 nm

| Peak # | RetTime [min] | Type | Width [min] | Area [mAU*s] | Height [mAU] | Area %  |
|--------|---------------|------|-------------|--------------|--------------|---------|
| 1      | 4.316         | BV R | 0.2817      | 76.27451     | 4.10623      | 0.6622  |
| 2      | 7.246         | BB   | 0.3061      | 1.14416e4    | 567.88684    | 99.3378 |

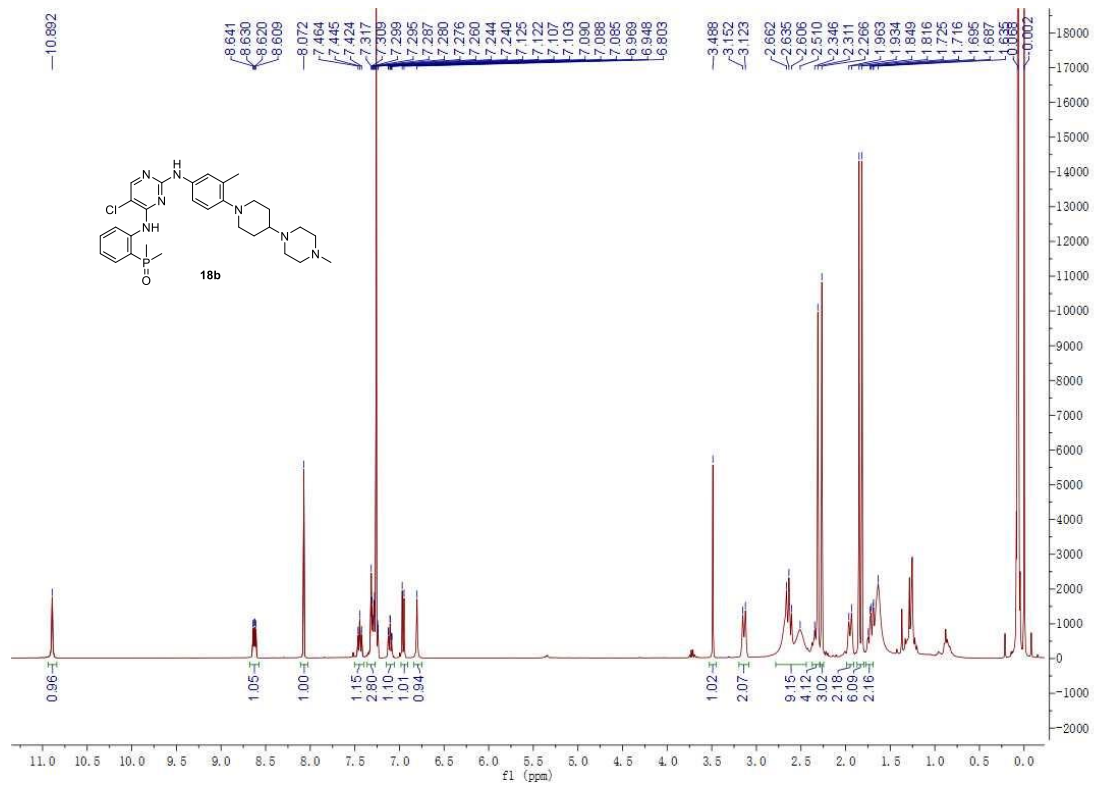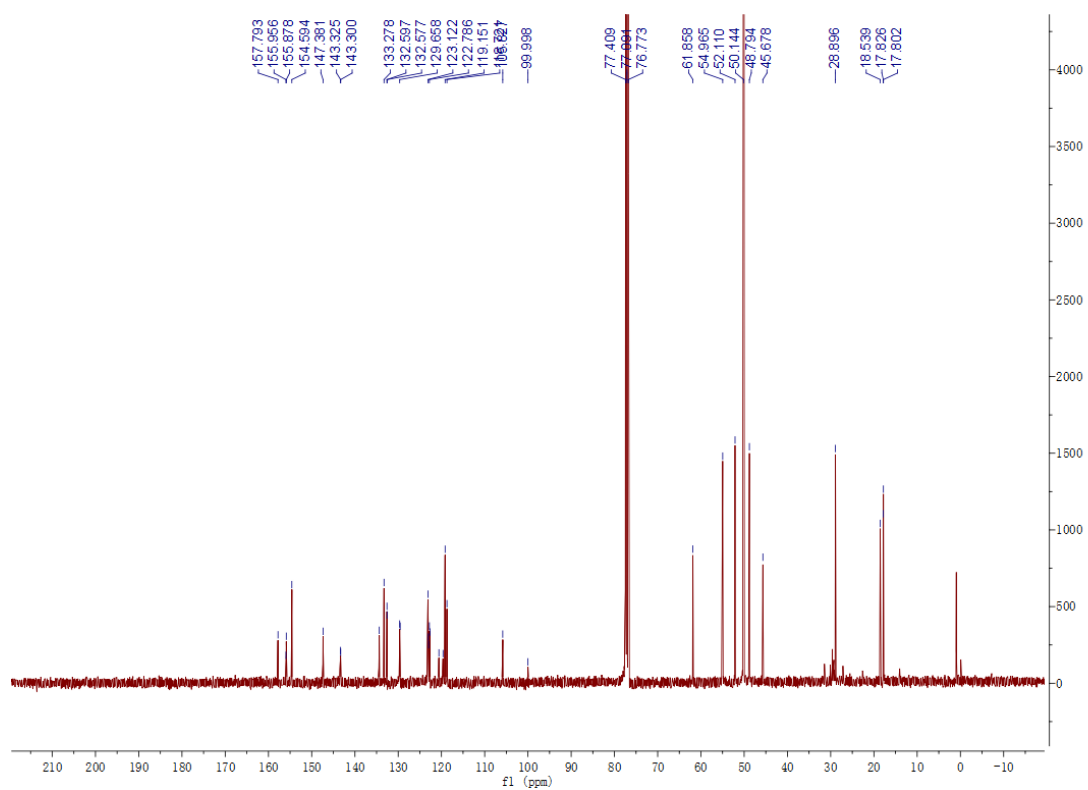

```

=====
Acq. Operator   : 系统
Sample Operator : 系统
Acq. Instrument : 1260LC
Injection Date  : 28/01/2021 18:03:15
Location       : 1
Inj Volume     : 15.000 µl

Acq. Method    : E:\DK\TL\方法80C-20A-30min-1u.M
Last changed   : 28/01/2021 15:35:50 by 系统
                (modified after loading)

Analysis Method : E:\DK\TL\方法80C-20A-30min-1u.M
Last changed   : 06/04/2021 10:23:35 by 系统

```

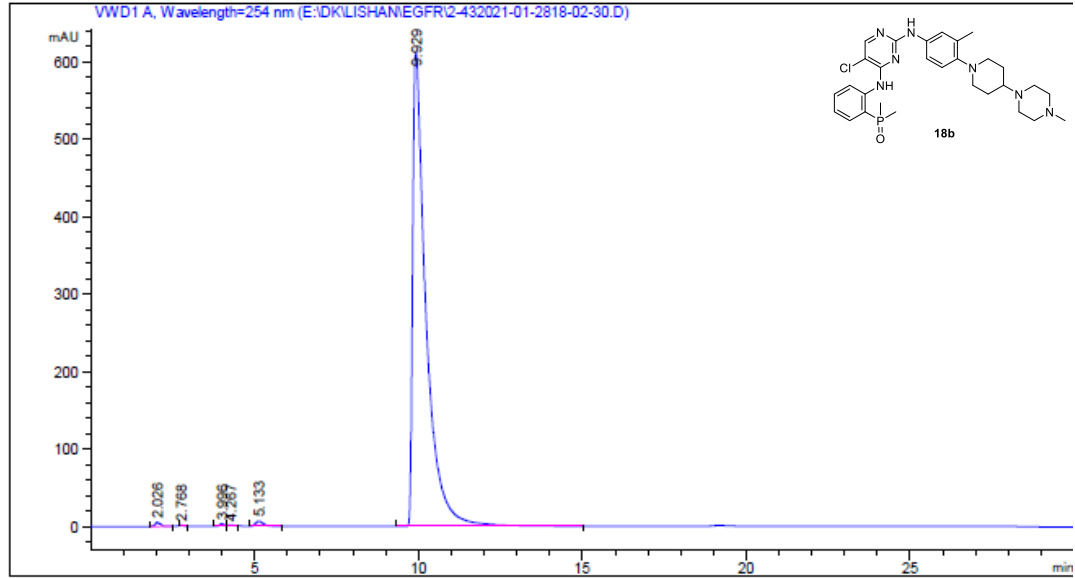

Area Percent Report

```

=====
Sorted By      : Signal
Multiplier     : 1.0000
Dilution       : 1.0000
Sample Amount  : 20.00000 [ng/ul] (not used in calc.)
Use Multiplier & Dilution Factor with ISTDs

```

Signal 1: VWD1 A, Wavelength=254 nm

| Peak # | RetTime [min] | Type | Width [min] | Area [mAU*s] | Height [mAU] | Area %  |
|--------|---------------|------|-------------|--------------|--------------|---------|
| 1      | 2.026         | BB   | 0.1461      | 60.12381     | 5.43370      | 0.3404  |
| 2      | 2.768         | VB   | 0.1023      | 13.20130     | 1.76338      | 0.0747  |
| 3      | 3.996         | BV   | 0.1631      | 34.71921     | 3.04300      | 0.1966  |
| 4      | 4.267         | VV   | 0.1981      | 27.72350     | 2.04582      | 0.1570  |
| 5      | 5.133         | BB   | 0.2471      | 108.44701    | 6.65446      | 0.6140  |
| 6      | 9.929         | BB   | 0.4049      | 1.74196e4    | 612.32159    | 98.6174 |

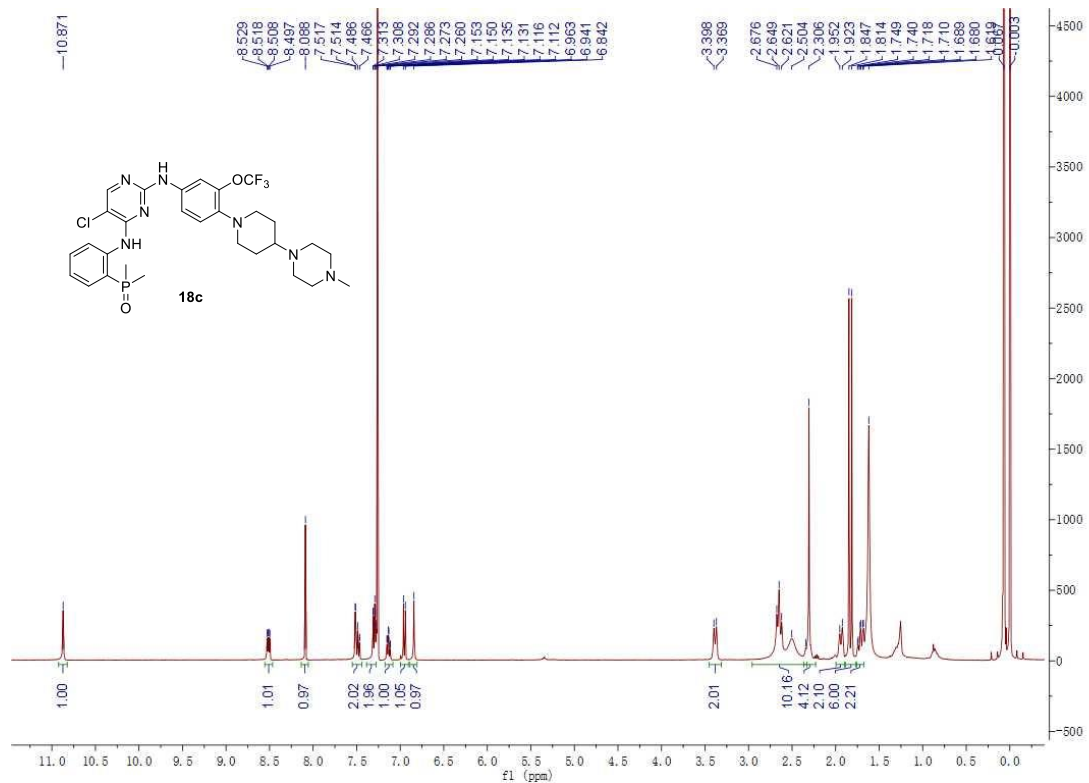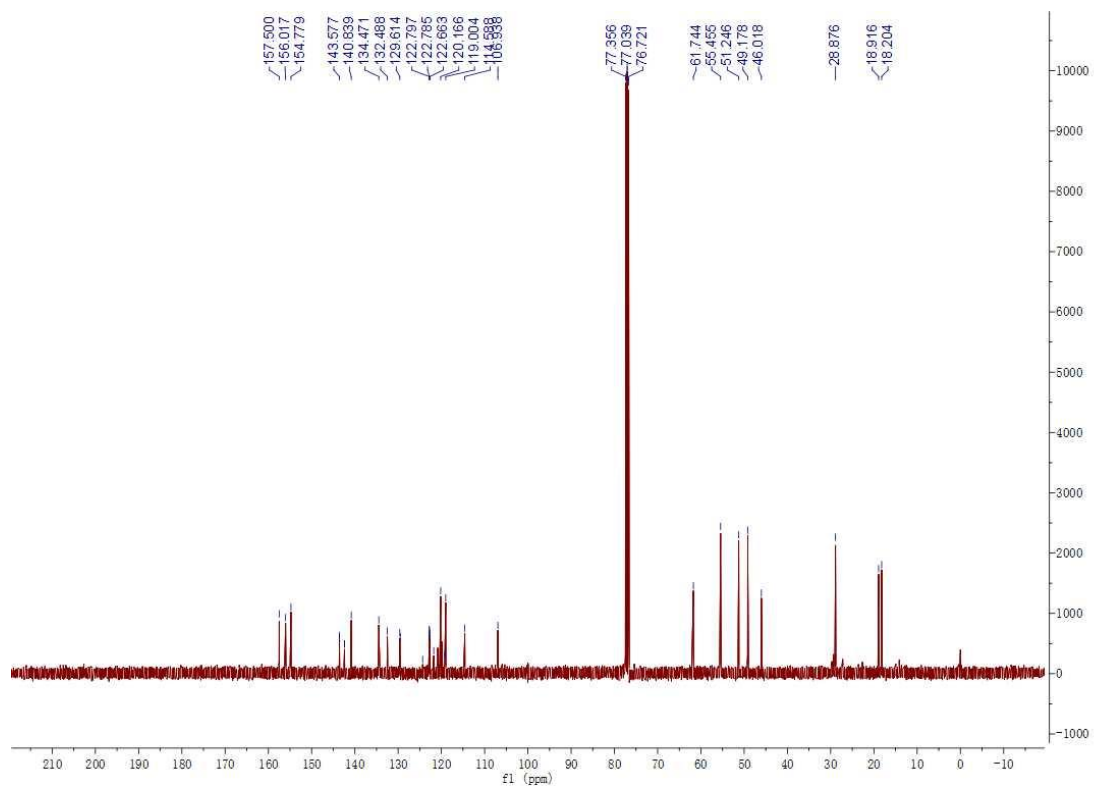

```

=====
Acq. Operator   : 系统
Sample Operator : 系统
Acq. Instrument : 1260LC
Injection Date  : 28/01/2021 16:46:01
Location       : 1
Inj Volume     : 15.000 µl

Acq. Method    : E:\DK\TL\方法80C-20A-30min-1u.M
Last changed   : 28/01/2021 15:35:50 by 系统
                (modified after loading)
Analysis Method: E:\DK\TL\方法80C-20A-30min-1u.M
Last changed   : 06/04/2021 10:23:35 by 系统

```

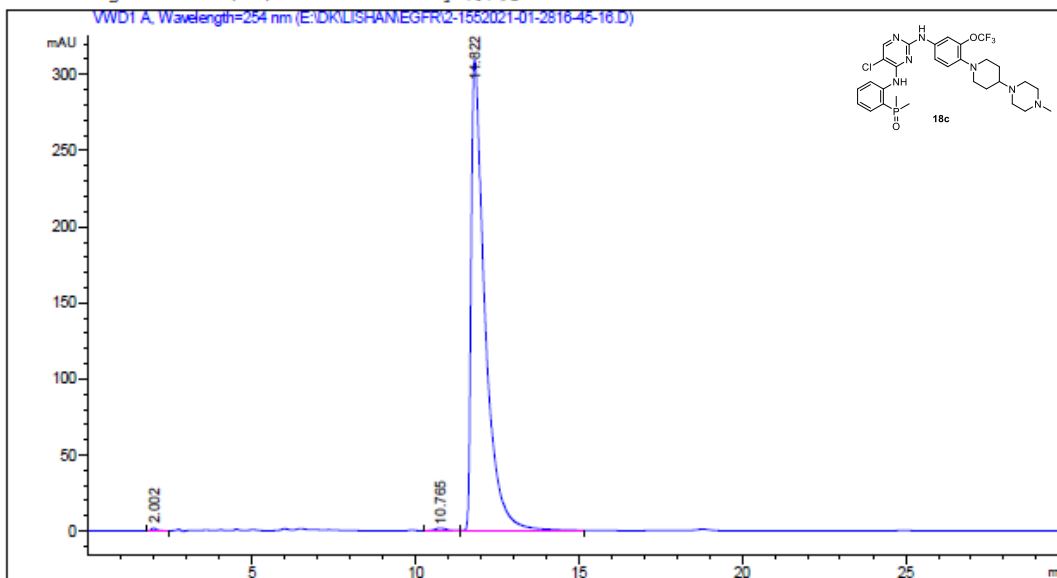

Area Percent Report

```

=====
Sorted By      : Signal
Multiplier     : 1.0000
Dilution       : 1.0000
Sample Amount  : 20.00000 [ng/ul] (not used in calc.)
Use Multiplier & Dilution Factor with ISTDs

```

Signal 1: VWD1 A, Wavelength=254 nm

| Peak # | RetTime [min] | Type | Width [min] | Area [mAU*s] | Height [mAU] | Area %  |
|--------|---------------|------|-------------|--------------|--------------|---------|
| 1      | 2.002         | BB   | 0.1641      | 22.51513     | 1.97370      | 0.2468  |
| 2      | 10.765        | BB   | 0.3587      | 40.68840     | 1.73431      | 0.4460  |
| 3      | 11.822        | BB   | 0.4212      | 9060.61035   | 309.85352    | 99.3073 |

Totals : 9123.81388 313.56152



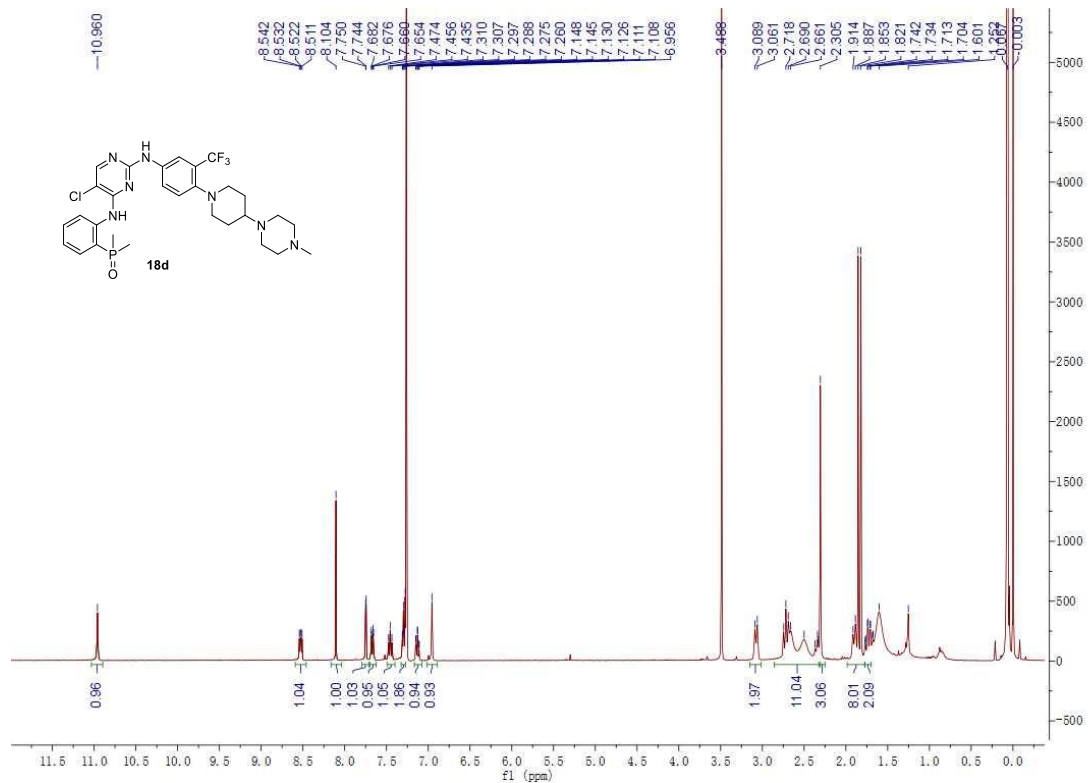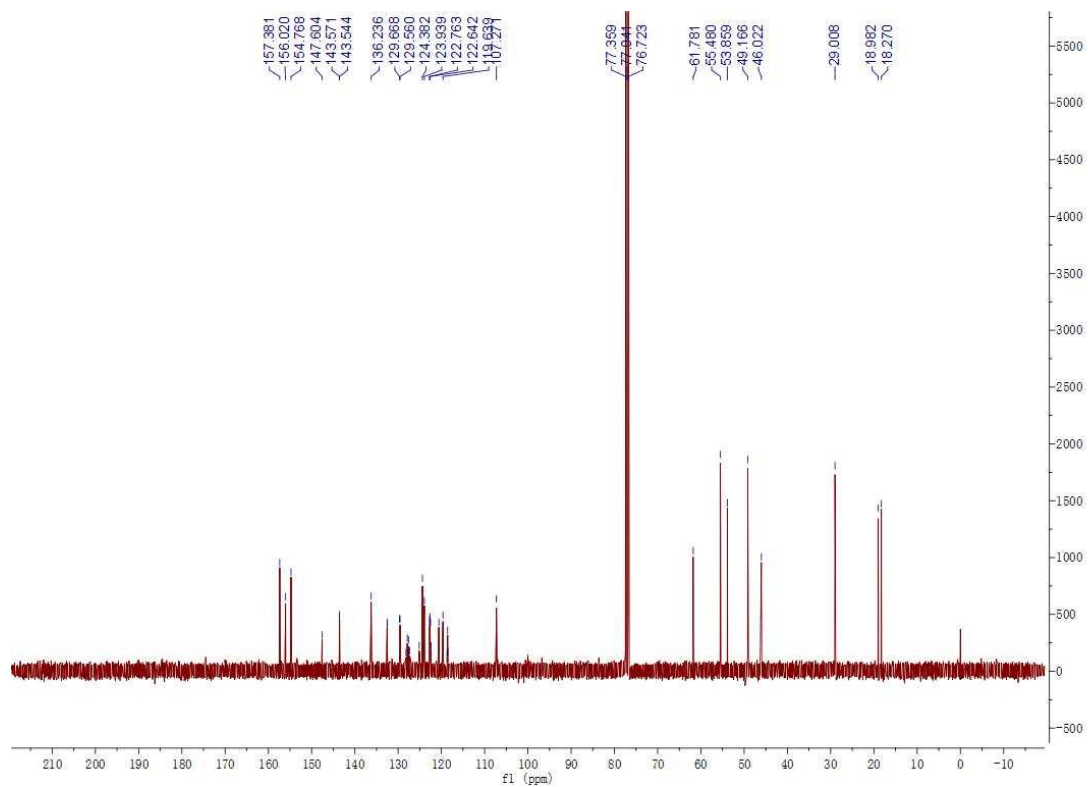

```

=====
Acq. Operator   : 系统
Sample Operator : 系统
Acq. Instrument : 1260LC
Injection Date  : 28/01/2021 09:01:04
Location       : 1
Inj Volume     : 15.000 µl

Acq. Method    : E:\DK\TL\方法80C-20A-30min-1u.M
Last changed   : 28/01/2021 08:59:34 by 系统
                (modified after loading)
Analysis Method: E:\DK\TL\方法80C-20A-30min-1u.M
Last changed   : 06/04/2021 10:23:35 by 系统
=====

```

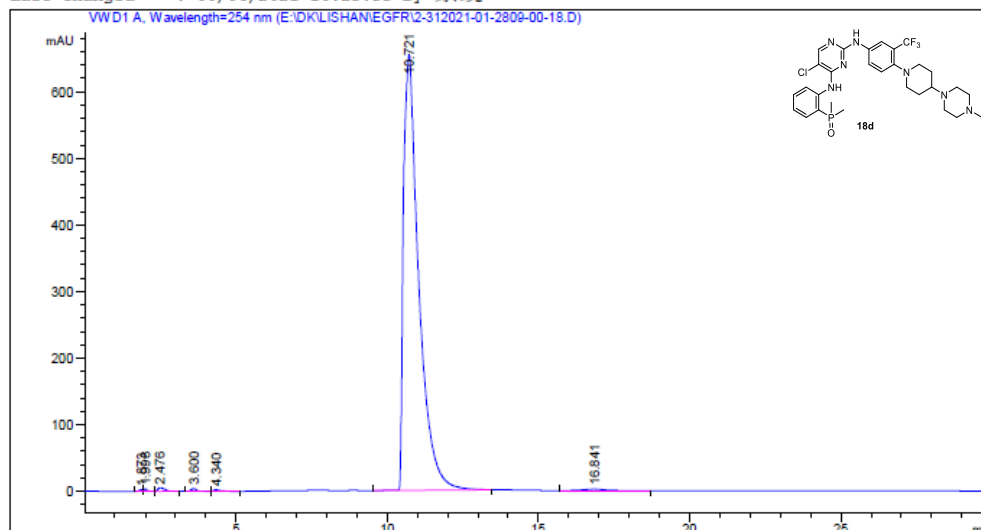

=====  
Area Percent Report  
=====

```

Sorted By      :      Signal
Multiplier     :      1.0000
Dilution       :      1.0000
Sample Amount  :      20.00000 [ng/ul] (not used in calc.)
Use Multiplier & Dilution Factor with ISTDs

```

Signal 1: WVD1 A, Wavelength=254 nm

| Peak # | RetTime [min] | Type | Width [min] | Area [mAU*s] | Height [mAU] | Area %  |
|--------|---------------|------|-------------|--------------|--------------|---------|
| 1      | 1.873         | BV   | 0.1301      | 19.10778     | 2.27152      | 0.0824  |
| 2      | 1.998         | VV   | 0.1075      | 26.40466     | 3.52252      | 0.1139  |
| 3      | 2.476         | VB   | 0.2207      | 84.48629     | 5.19726      | 0.3644  |
| 4      | 3.600         | BV R | 0.1903      | 51.37792     | 3.96267      | 0.2216  |
| 5      | 4.340         | VB   | 0.2768      | 40.02019     | 2.01426      | 0.1726  |
| 6      | 10.721        | VB R | 0.4666      | 2.28632e4    | 654.35315    | 98.6166 |

7 16.841 BB 0.6485 99.32301 2.09715 0.4284

Totals : 2.31839e4 673.41852

=====  
\*\*\* End of Report \*\*\*

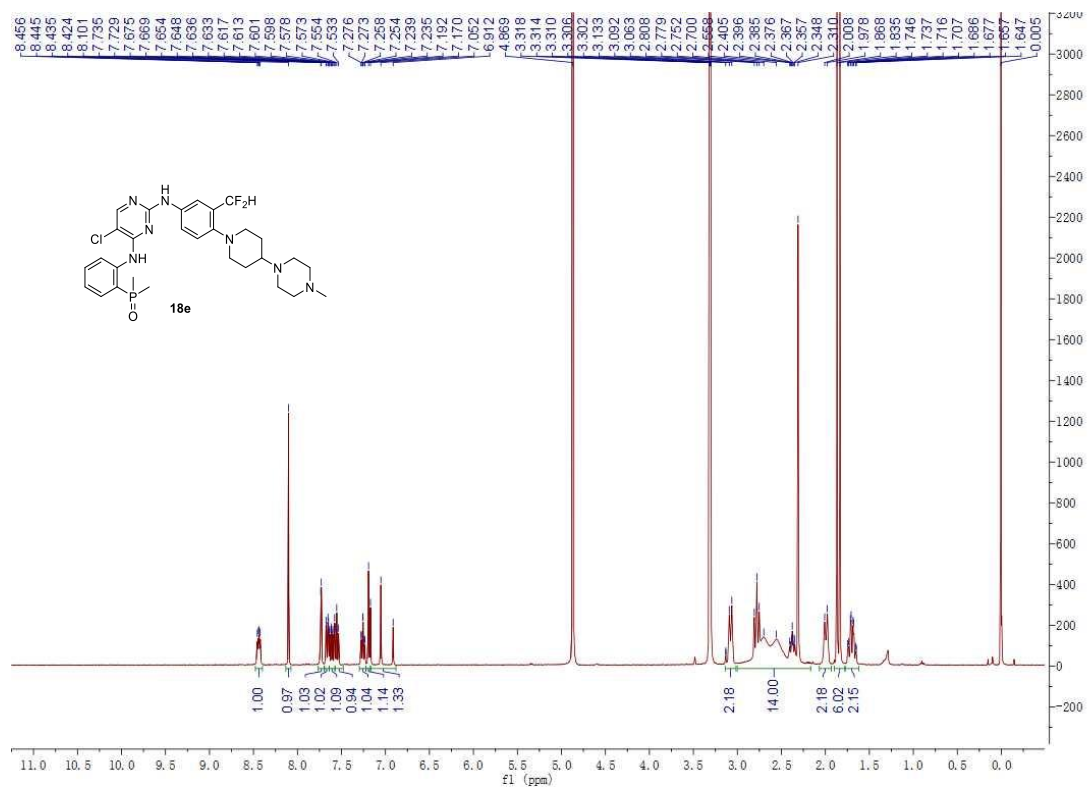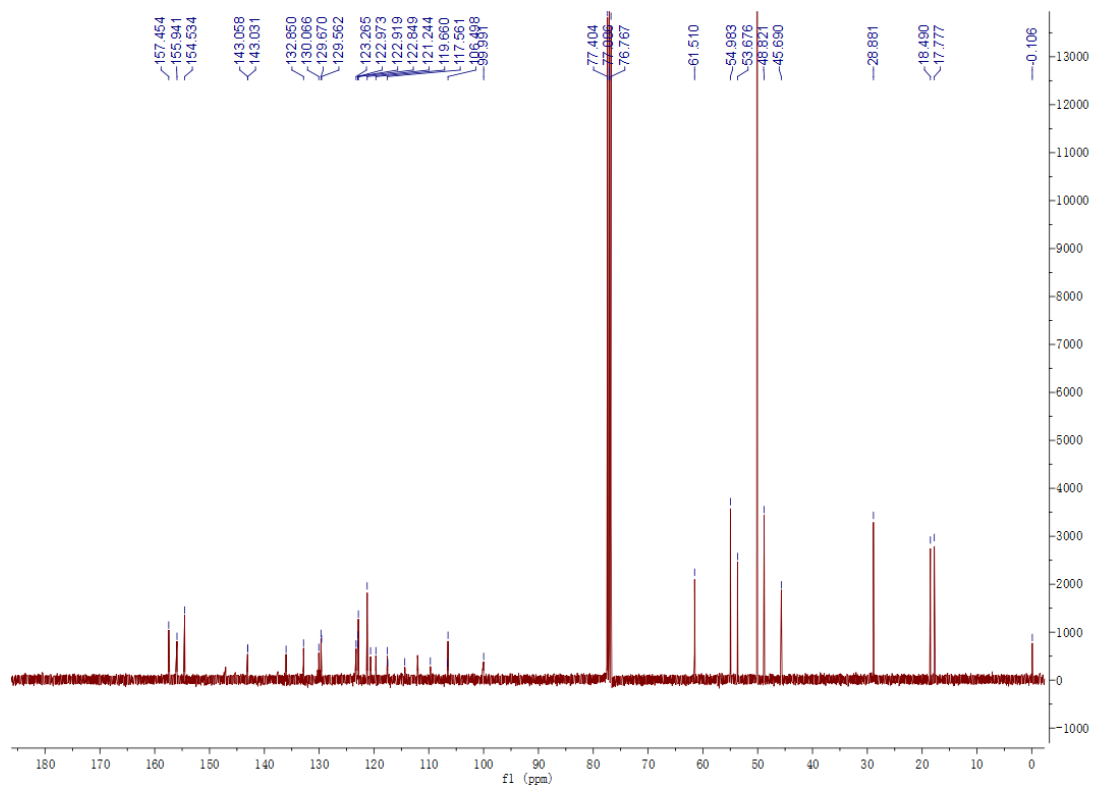

```

=====
Acq. Operator   : 系统
Sample Operator : 系统
Acq. Instrument : 1260LC
Injection Date  : 27/01/2021 16:06:14
Location       : 1
Inj Volume     : 15.000 µl

Acq. Method    : E:\DK\TL\方法80C-20A-30min-1u.M
Last changed   : 27/01/2021 13:57:19 by 系统
                (modified after loading)
Analysis Method : E:\DK\TL\方法80C-20A-30min-1u.M
Last changed   : 06/04/2021 10:23:35 by 系统
=====

```

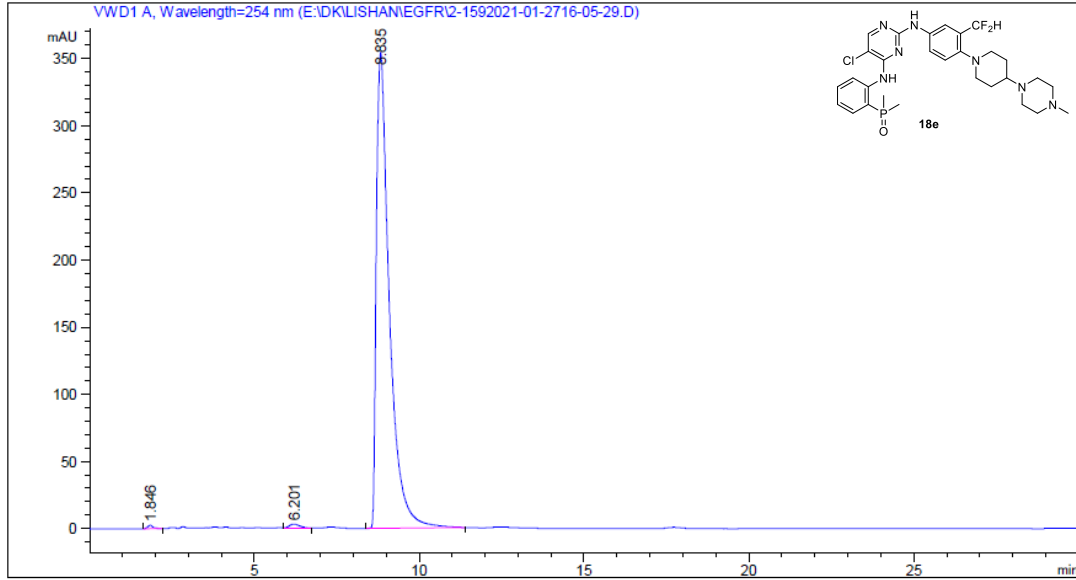

Area Percent Report

```

=====
Sorted By      :      Signal
Multiplier     :      1.0000
Dilution       :      1.0000
Sample Amount  :      20.00000 [ng/ul] (not used in calc.)
Use Multiplier & Dilution Factor with ISTDs
=====

```

Signal 1: VWD1 A, Wavelength=254 nm

| Peak # | RetTime [min] | Type | Width [min] | Area [mAU*s] | Height [mAU] | Area %  |
|--------|---------------|------|-------------|--------------|--------------|---------|
| 1      | 1.846         | BV   | 0.1588      | 29.64580     | 2.66400      | 0.3024  |
| 2      | 6.201         | BB   | 0.3241      | 57.58860     | 2.76406      | 0.5874  |
| 3      | 8.835         | BB   | 0.4069      | 9716.12109   | 354.35516    | 99.1102 |

Totals :                            9803.35549   359.78322

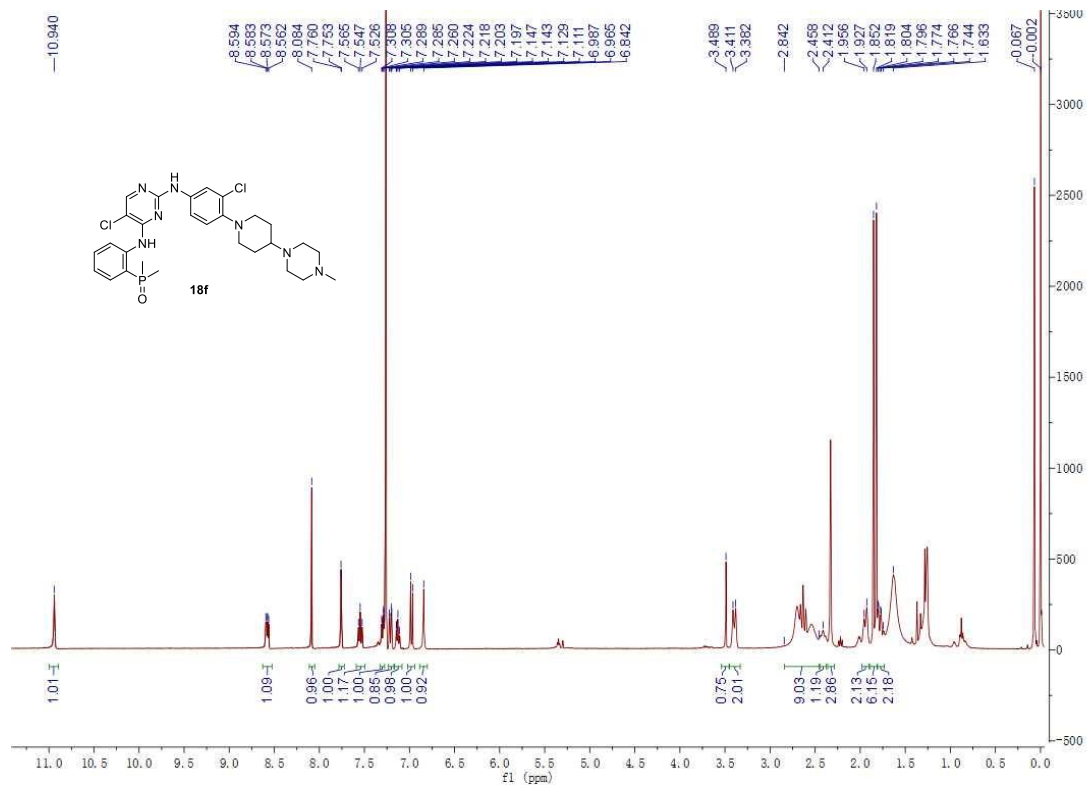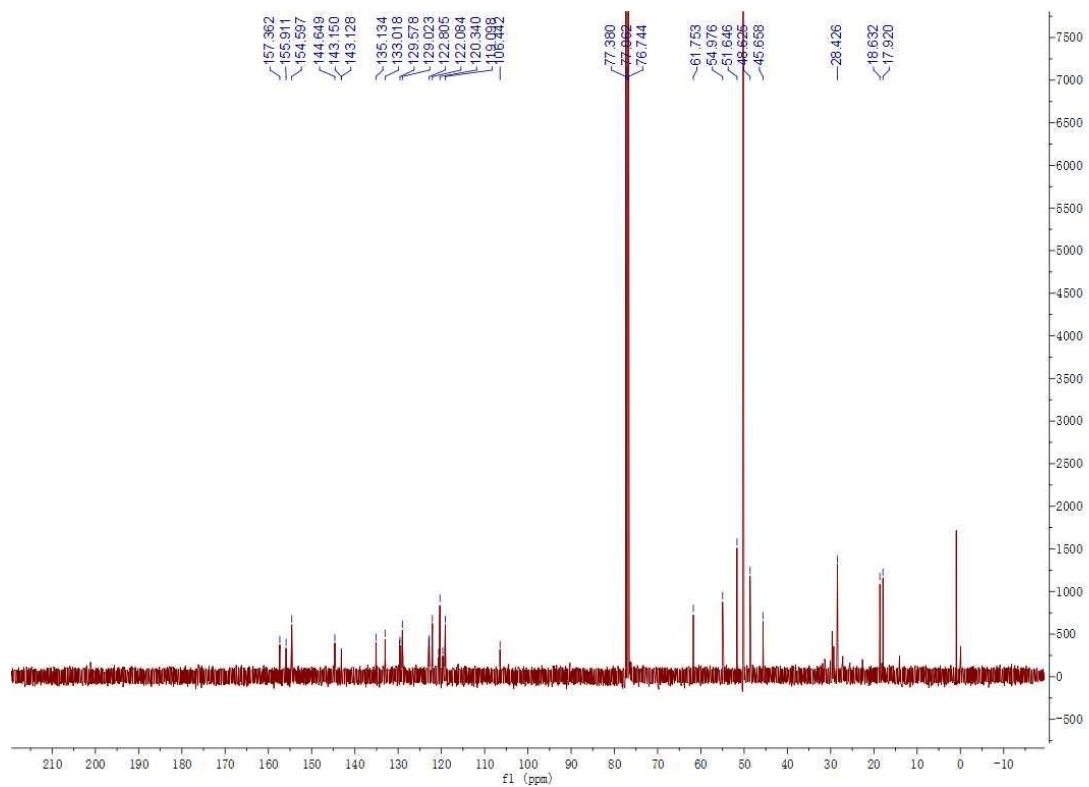

```

=====
Acq. Operator   : 系统
Sample Operator  : 系统
Acq. Instrument : 1260LC                      Location   : 1
Injection Date  : 27/01/2021 14:37:02      Inj Volume : 15.000 µl

Acq. Method     : E:\DK\TL\方法80C-20A-30min-1u.M
Last changed    : 27/01/2021 13:57:19 by 系统
                  (modified after loading)

Analysis Method : E:\DK\TL\方法80C-20A-30min-1u.M
Last changed    : 06/04/2021 10:23:35 by 系统
=====

```

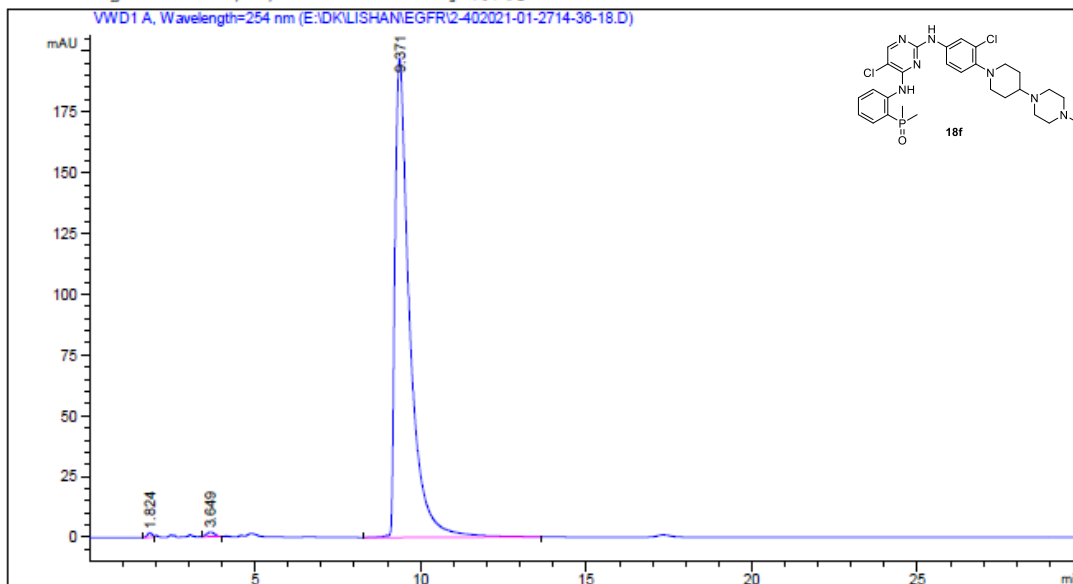

Area Percent Report

```

=====
Sorted By      : Signal
Multiplier     : 1.0000
Dilution       : 1.0000
Sample Amount  : 20.00000 [ng/ul] (not used in calc.)
Use Multiplier & Dilution Factor with ISTDs
=====

```

Signal 1: VWD1 A, Wavelength=254 nm

| Peak # | RetTime [min] | Type | Width [min] | Area [mAU*s] | Height [mAU] | Area %  |
|--------|---------------|------|-------------|--------------|--------------|---------|
| 1      | 1.824         | BV   | 0.1409      | 18.95191     | 1.99387      | 0.3095  |
| 2      | 3.649         | BB   | 0.2465      | 29.13995     | 1.84247      | 0.4759  |
| 3      | 9.371         | VB R | 0.4543      | 6075.28857   | 196.73708    | 99.2146 |

Totals : 6123.38043 200.57341

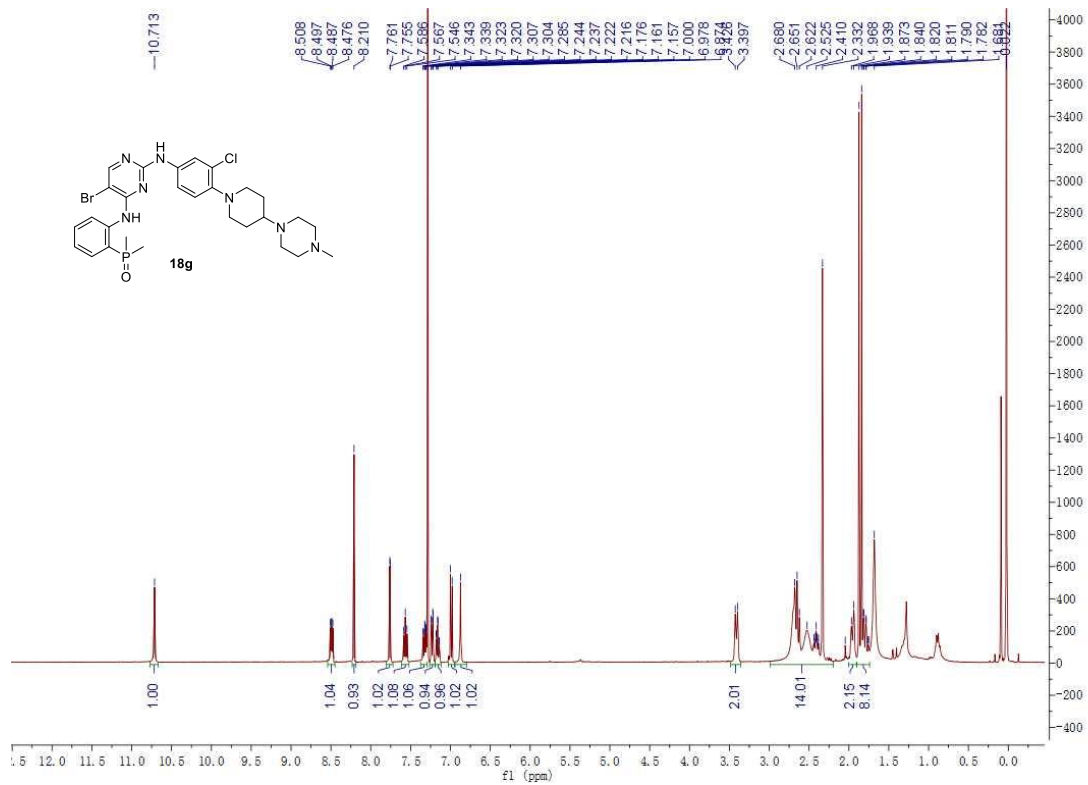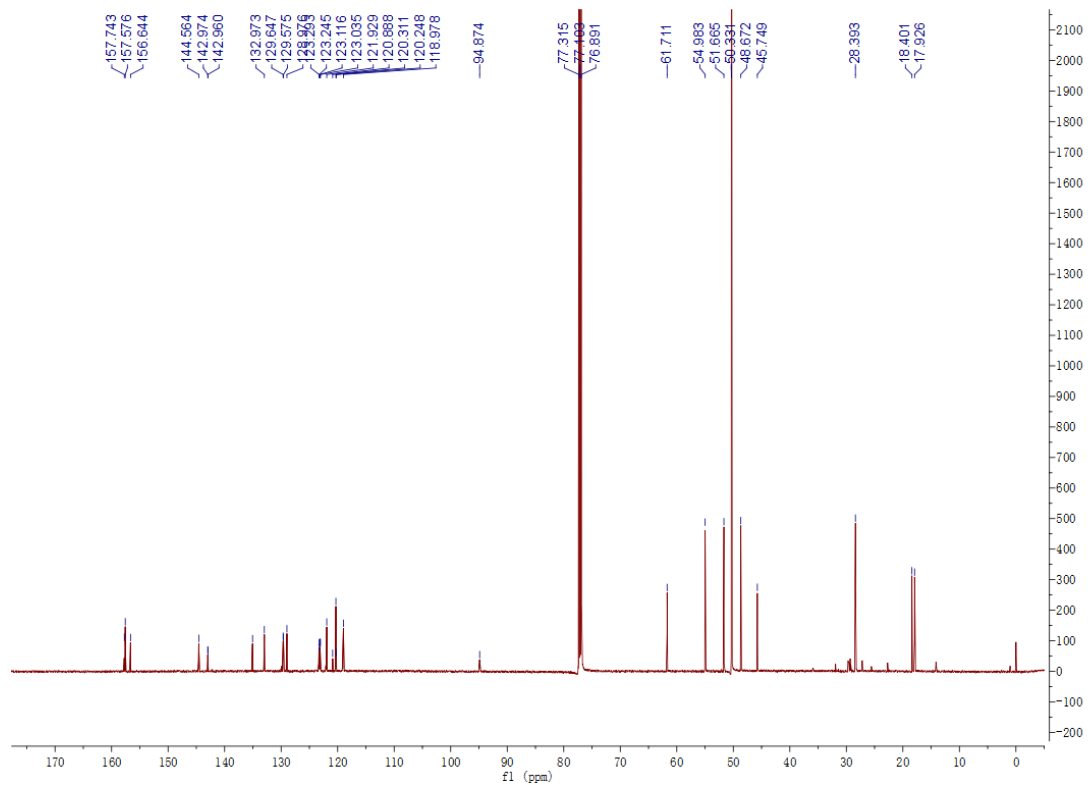

```

=====
Acq. Operator   : 系统
Sample Operator : 系统
Acq. Instrument : 1260LC                      Location : 1
Injection Date  : 27/01/2021 15:34:07
                                           Inj Volume : 15.000 µl

Acq. Method     : E:\DK\TL\方法80C-20A-30min-1u.M
Last changed    : 27/01/2021 13:57:19 by 系统
                  (modified after loading)

Analysis Method : E:\DK\TL\方法80C-20A-30min-1u.M
Last changed    : 06/04/2021 10:23:35 by 系统
=====

```

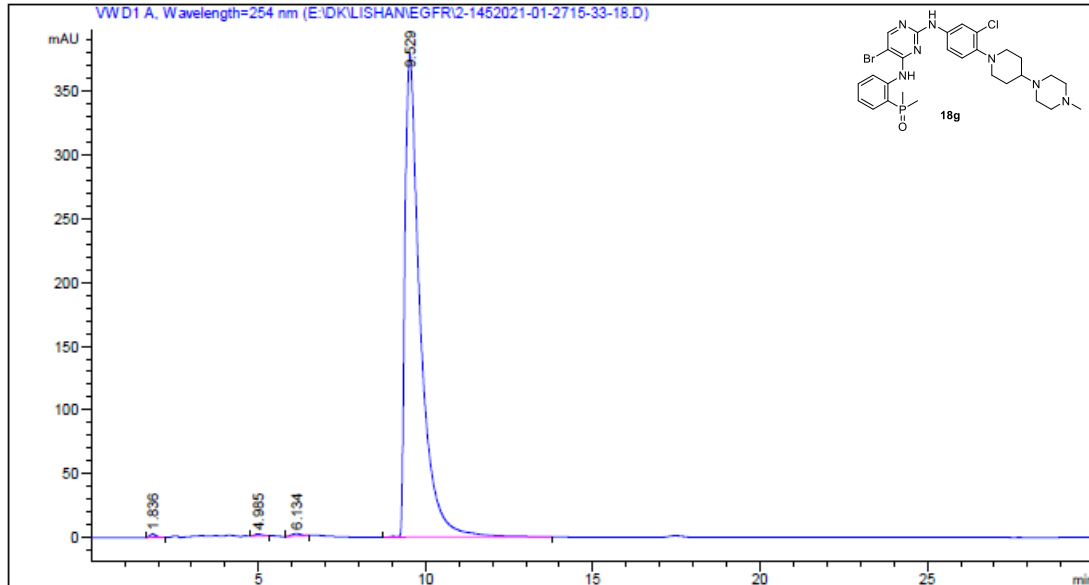

=====  
Area Percent Report  
=====

```

Sorted By      : Signal
Multiplier     : 1.0000
Dilution       : 1.0000
Sample Amount  : 20.00000 [ng/ul] (not used in calc.)
Use Multiplier & Dilution Factor with ISTDs

```

Signal 1: VWD1 A, Wavelength=254 nm

| Peak # | RetTime [min] | Type | Width [min] | Area [mAU*s] | Height [mAU] | Area %  |
|--------|---------------|------|-------------|--------------|--------------|---------|
| 1      | 1.836         | BB   | 0.1559      | 31.56513     | 2.88000      | 0.2604  |
| 2      | 4.985         | VB   | 0.2246      | 24.88697     | 1.73206      | 0.2053  |
| 3      | 6.134         | BB   | 0.2928      | 38.20140     | 2.05600      | 0.3152  |
| 4      | 9.529         | VB R | 0.4663      | 1.20263e4    | 378.90887    | 99.2191 |

Totals :                                    1.21210e4    385.57694



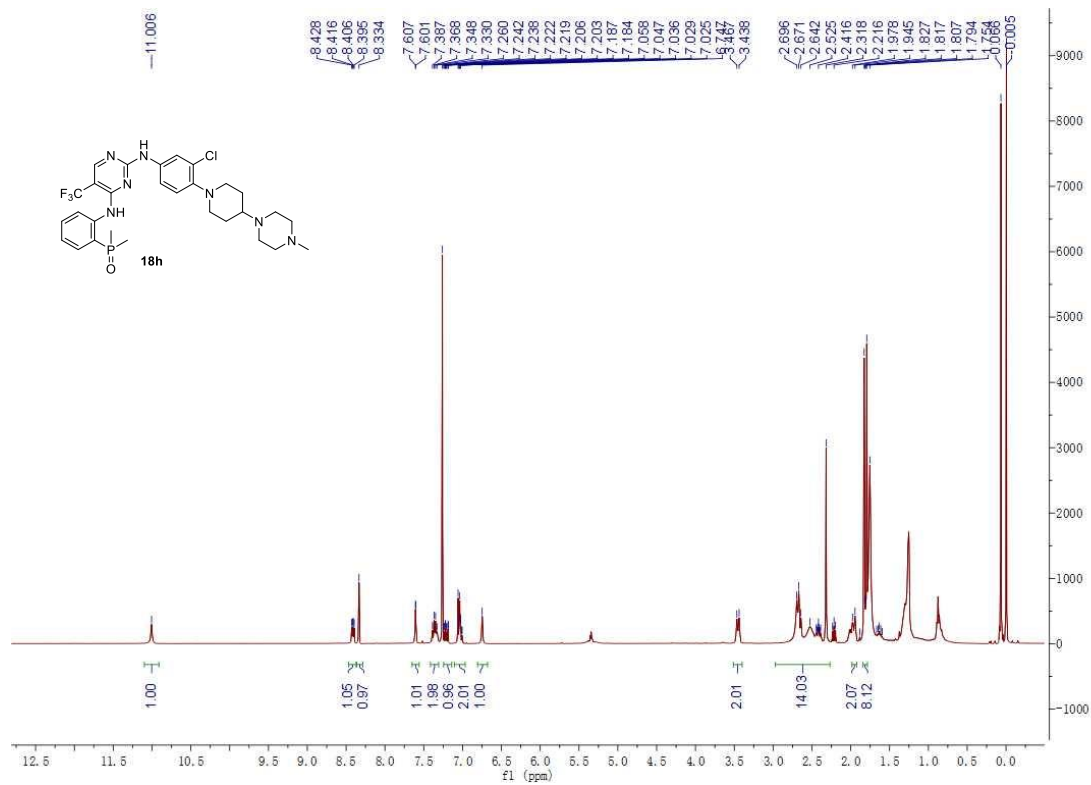

```

=====
Acq. Operator   : 系统
Sample Operator : 系统
Acq. Instrument : 1260LC
Injection Date  : 27/01/2021 10:03:29
Location       : 1
Inj Volume     : 15.000 µl

Acq. Method    : E:\DK\TL\方法75C-25A-60MIN.M
Last changed   : 27/01/2021 10:00:19 by 系统
                (modified after loading)
Analysis Method : E:\DK\TL\方法80C-20A-30min-1u.M
Last changed   : 06/04/2021 10:23:35 by 系统

```

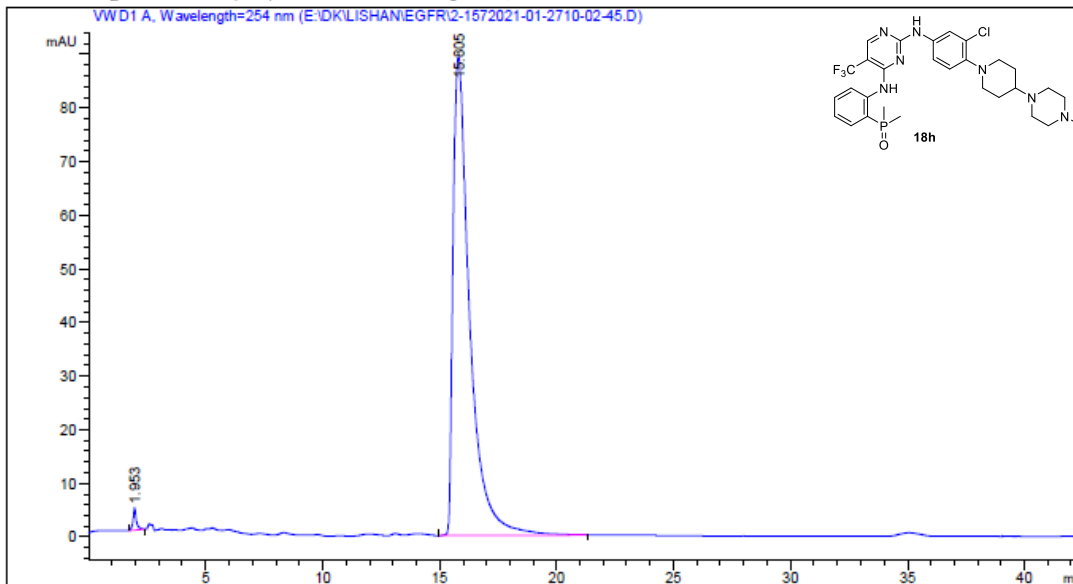

Area Percent Report

```

=====
Sorted By      : Signal
Multiplier    : 1.0000
Dilution      : 1.0000
Sample Amount  : 20.00000 [ng/ul] (not used in calc.)
Use Multiplier & Dilution Factor with ISTDs

```

Signal 1: VWD1 A, Wavelength=254 nm

| Peak #   | RetTime [min] | Type | Width [min] | Area [mAU*s] | Height [mAU] | Area %  |
|----------|---------------|------|-------------|--------------|--------------|---------|
| 1        | 1.953         | BB   | 0.1402      | 42.04947     | 4.25991      | 0.9390  |
| 2        | 15.805        | BB   | 0.7356      | 4436.13184   | 89.29628     | 99.0610 |
| Totals : |               |      |             | 4478.18131   | 93.55619     |         |

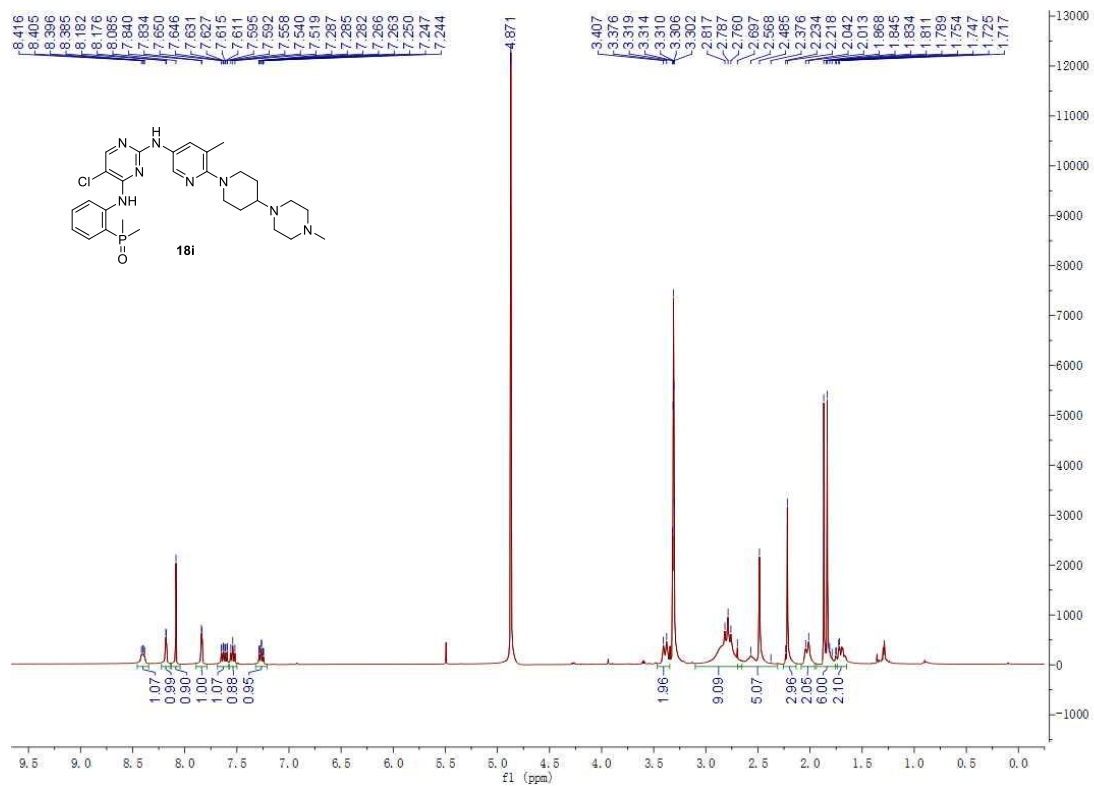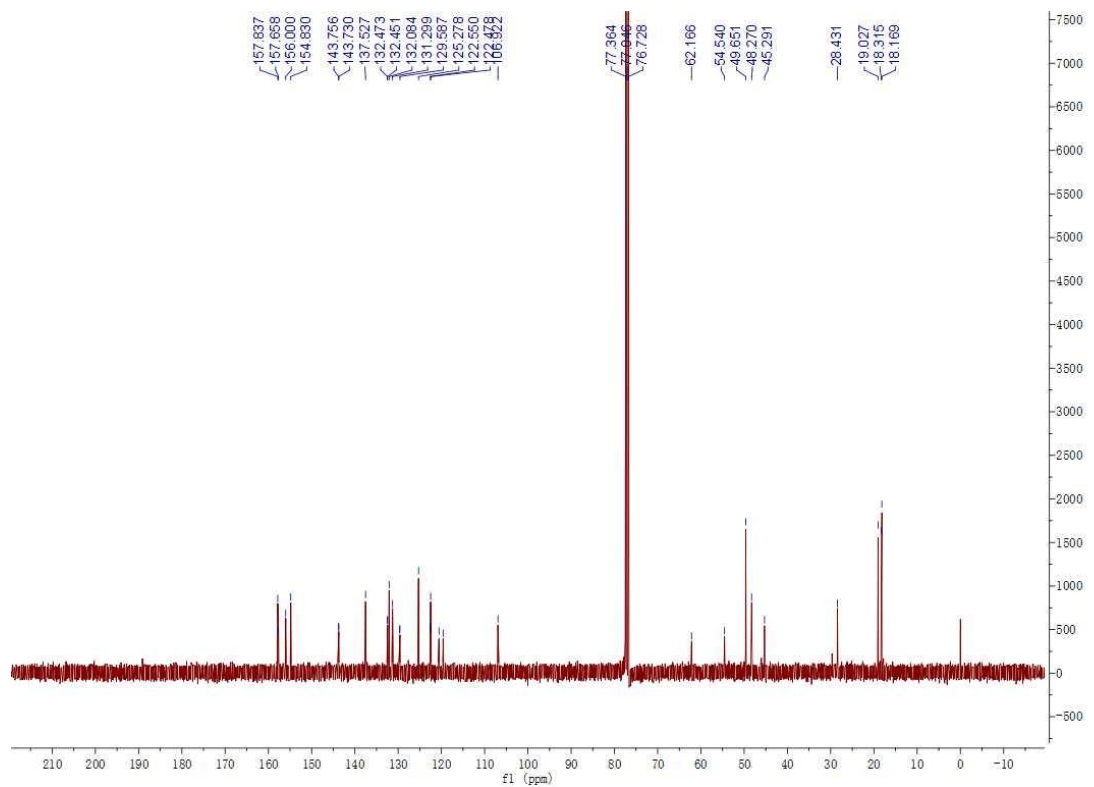

```

=====
Acq. Operator   : 系统
Sample Operator : 系统
Acq. Instrument : 1260LC                      Location   :    1
Injection Date  : 28/01/2021 09:51:02        Inj Volume: 15.000 µl

Acq. Method    : E:\DK\TL\方法80C-20A-30min-1u.M
Last changed   : 28/01/2021 09:44:07 by 系统
                (modified after loading)

Analysis Method: E:\DK\TL\方法80C-20A-30min-1u.M
Last changed   : 06/04/2021 10:23:35 by 系统

```

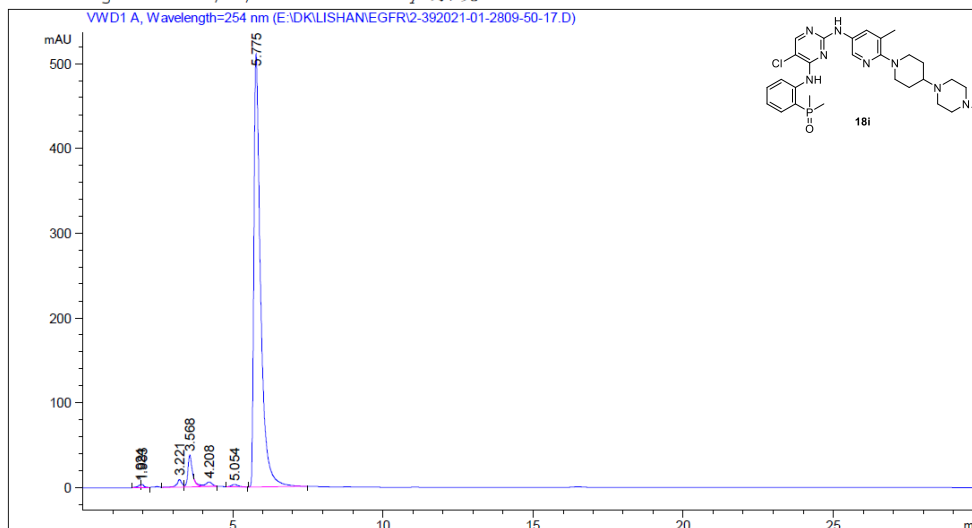

```

=====
                          Area Percent Report
=====

```

```

Sorted By      :      Signal
Multiplier     :      1.0000
Dilution       :      1.0000
Sample Amount  :      20.00000 [ng/ul] (not used in calc.)
Use Multiplier & Dilution Factor with ISTDs

```

Signal 1: WVD1 A, Wavelength=254 nm

| Peak # | RetTime [min] | Type | Width [min] | Area [mAU*s] | Height [mAU] | Area % |
|--------|---------------|------|-------------|--------------|--------------|--------|
| 1      | 1.924         | BV   | 0.0975      | 23.87279     | 3.18393      | 0.2767 |
| 2      | 1.983         | VB   | 0.0993      | 24.35547     | 3.58136      | 0.2823 |
| 3      | 3.221         | BV   | 0.1652      | 105.38245    | 8.95810      | 1.2214 |
| 4      | 3.568         | VV R | 0.1560      | 397.07452    | 37.36277     | 4.6020 |
| 5      | 4.208         | VB E | 0.2451      | 88.56344     | 5.11211      | 1.0264 |
| 6      | 5.054         | BB   | 0.2249      | 40.30576     | 2.67399      | 0.4671 |

Data File E:\DK\LISHAN\EGFR\2-392021-01-2809-50-17.D  
Sample Name: 2-39

| Peak #   | RetTime [min] | Type | Width [min] | Area [mAU*s] | Height [mAU] | Area %  |
|----------|---------------|------|-------------|--------------|--------------|---------|
| 7        | 5.775         | BB   | 0.2306      | 7948.70361   | 510.79099    | 92.1241 |
| Totals : |               |      |             | 8628.25804   | 571.66324    |         |

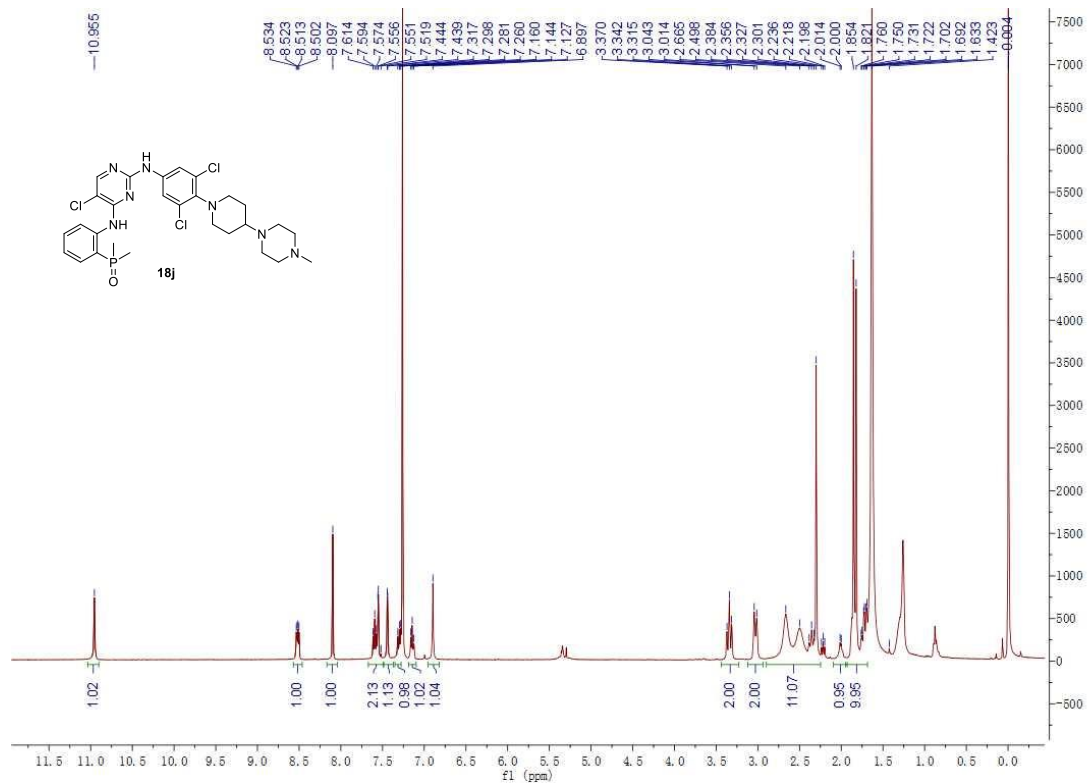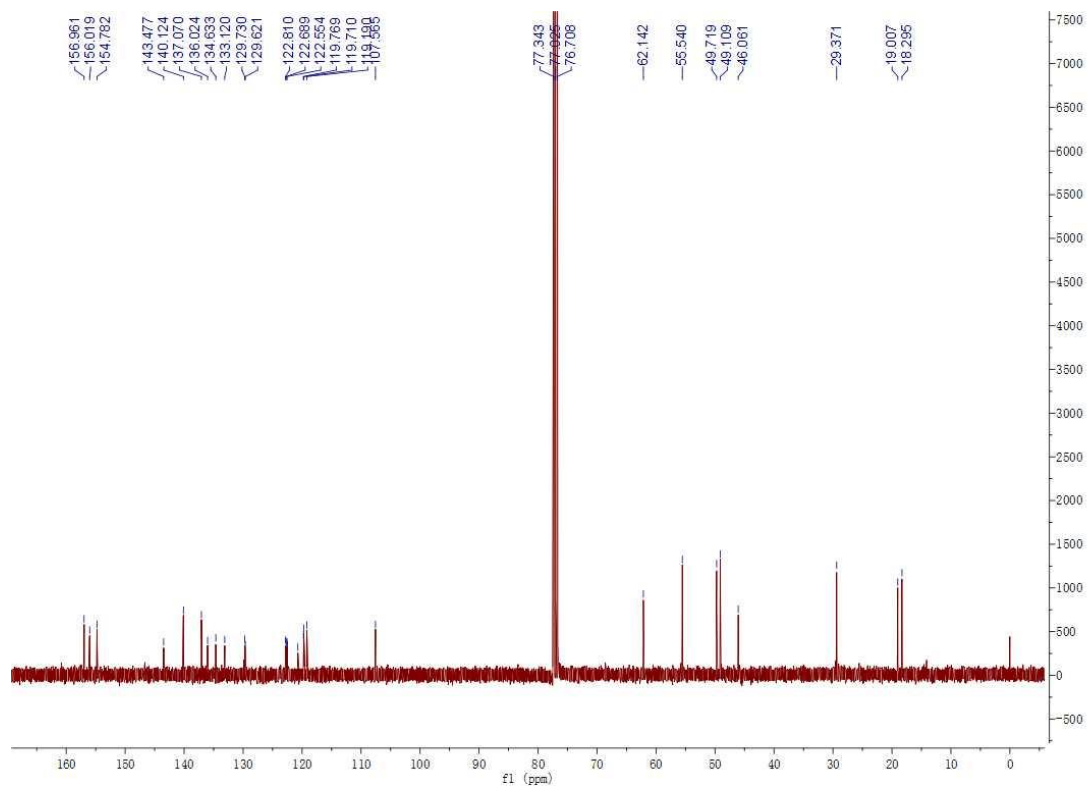

```

=====
Acq. Operator   : 系统
Sample Operator : 系统
Acq. Instrument : 1260LC
Injection Date  : 27/01/2021 13:58:23
Location       : 1
Inj Volume     : 15.000 µl

Acq. Method    : E:\DK\TL\方法80C-20A-30min-1u.M
Last changed   : 27/01/2021 13:57:19 by 系统
                (modified after loading)
Analysis Method : E:\DK\TL\方法80C-20A-30min-1u.M
Last changed   : 06/04/2021 10:23:35 by 系统
=====

```

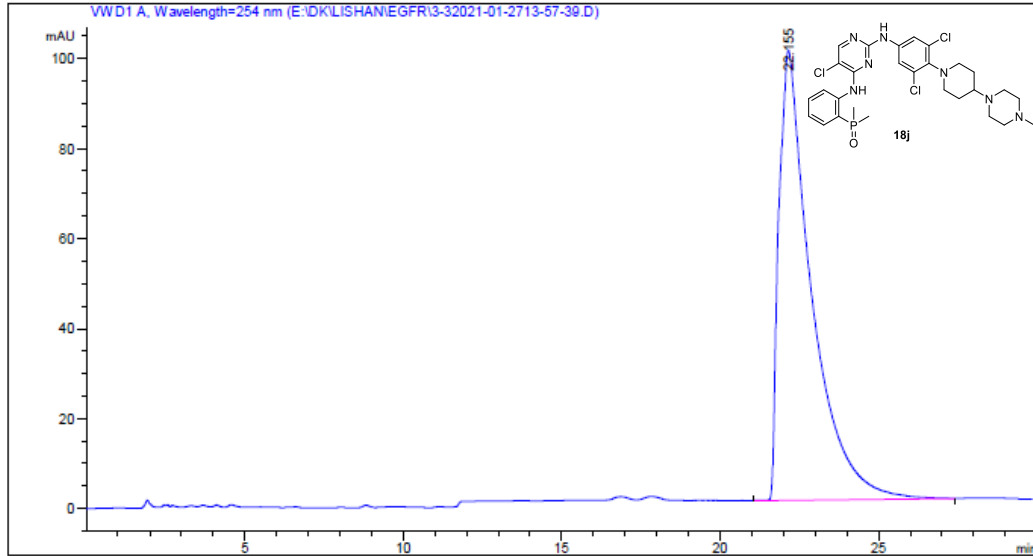

=====  
Area Percent Report  
=====

```

Sorted By      :      Signal
Multiplier     :      1.0000
Dilution       :      1.0000
Sample Amount  :      20.00000 [ng/ul] (not used in calc.)
Use Multiplier & Dilution Factor with ISTDs

```

Signal 1: VWD1 A, Wavelength=254 nm

| Peak # | RetTime [min] | Type | Width [min] | Area [mAU*s] | Height [mAU] | Area %   |
|--------|---------------|------|-------------|--------------|--------------|----------|
| 1      | 22.155        | BB   | 0.9403      | 7156.07959   | 99.95277     | 100.0000 |

Totals :                                7156.07959    99.95277

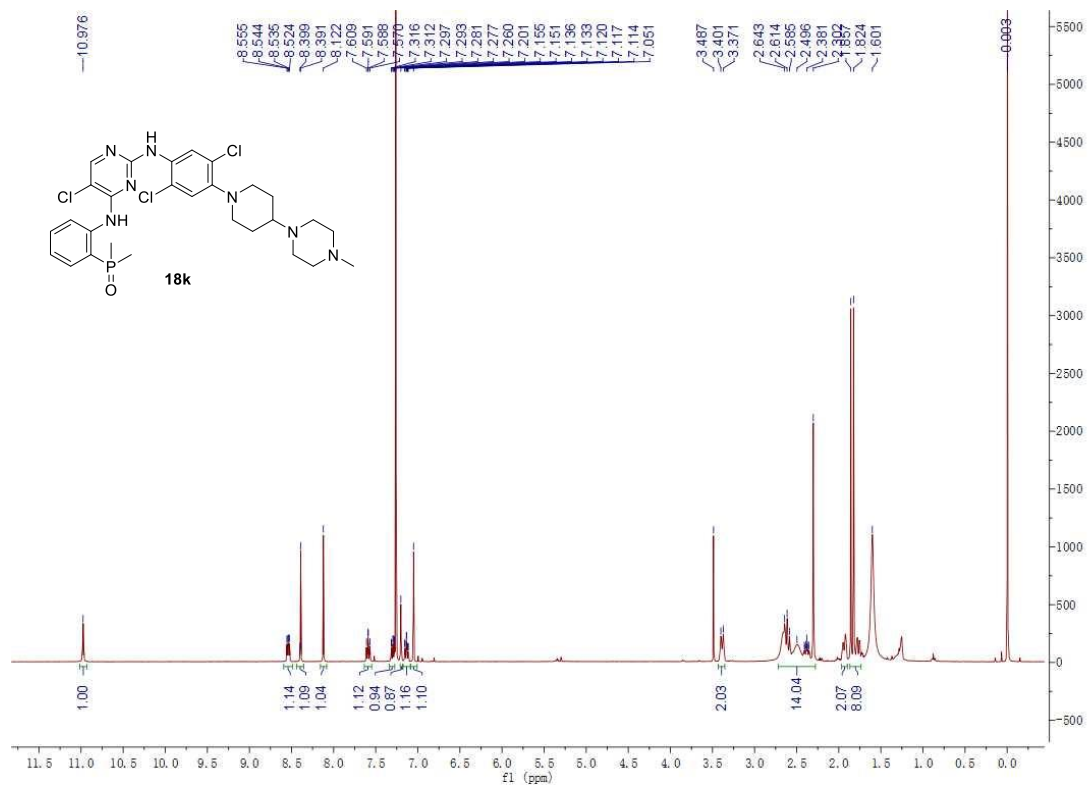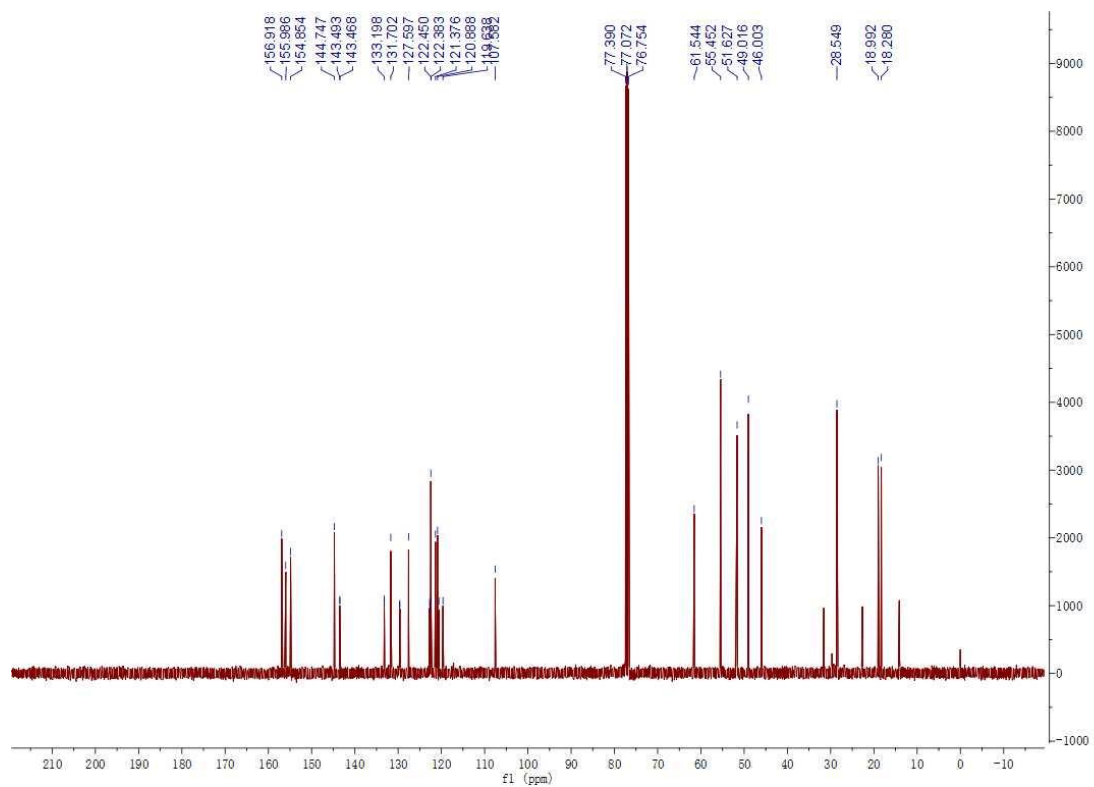

```

=====
Acq. Operator   : 系统
Sample Operator : 系统
Acq. Instrument : 1260LC
Injection Date  : 27/01/2021 16:43:53
Location       : 1
Inj Volume     : 15.000 µl

Acq. Method    : E:\DK\TL\方法80C-20A-30min-1u.M
Last changed   : 27/01/2021 13:57:19 by 系统
                (modified after loading)
Analysis Method: E:\DK\TL\方法80C-20A-30min-1u.M
Last changed   : 06/04/2021 10:23:35 by 系统

```

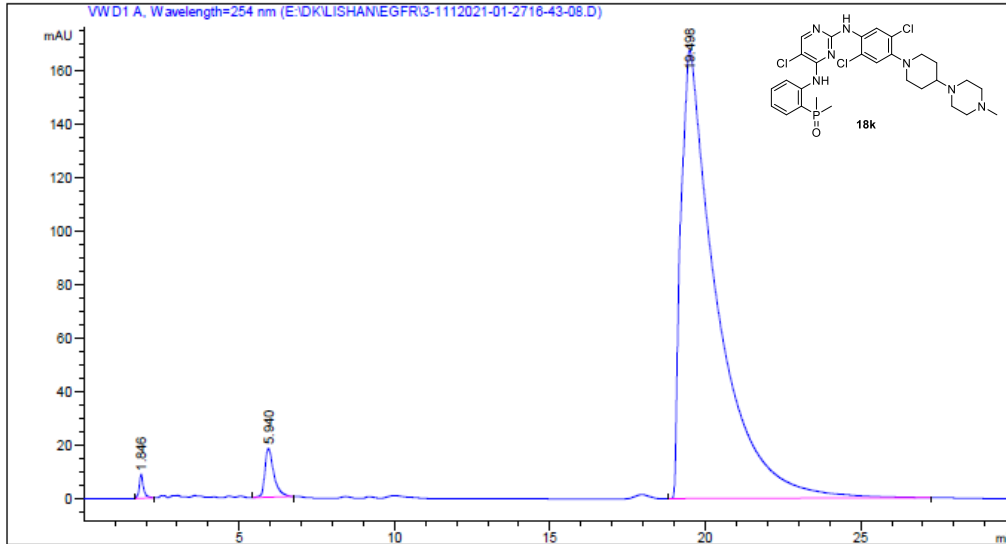

=====  
Area Percent Report  
=====

```

Sorted By      :      Signal
Multiplier     :      1.0000
Dilution       :      1.0000
Sample Amount  :      20.00000 [ng/ul] (not used in calc.)
Use Multiplier & Dilution Factor with ISTDs

```

Signal 1: VWD1 A, Wavelength=254 nm

| Peak # | RetTime [min] | Type | Width [min] | Area [MAU*s] | Height [MAU] | Area %  |
|--------|---------------|------|-------------|--------------|--------------|---------|
| 1      | 1.846         | BB   | 0.1367      | 83.74465     | 8.98485      | 0.6020  |
| 2      | 5.940         | BB   | 0.3020      | 370.19730    | 18.30449     | 2.6613  |
| 3      | 19.498        | BB   | 1.0413      | 1.34565e4    | 167.66962    | 96.7367 |

Totals :                    1.39104e4    194.95896



## References

- (1) Chen, Z.; Tong, L. J.; Tang, B. Y.; Liu, H. Y.; Wang, X.; Zhang, T.; Cao, X. W.; Chen, Y.; Li, H. L.; Qian, X. H.; Xu, Y. F.; Xie, H.; Ding, J., C11, a novel fibroblast growth factor receptor 1 (FGFR1) inhibitor, suppresses breast cancer metastasis and angiogenesis. *Acta Pharmacol Sin* **2019**, *40* (6): 823-832.
- (2) Yun, C. H.; Boggon, T. J.; Li, Y.; Woo, M. S.; Greulich, H.; Meyerson, M.; Eck, M. J., Structures of lung cancer-derived EGFR mutants and inhibitor complexes: mechanism of activation and insights into differential inhibitor sensitivity. *Cancer Cell* **2007**, *11* (3): 217-227.
- (3) Hanan, E. J.; Eigenbrot, C.; Bryan, M. C.; Burdick, D. J.; Chan, B. K.; Chen, Y.; Dotson, J.; Heald, R. A.; Jackson, P. S.; La, H.; Lainchbury, M. D.; Malek, S.; Purkey, H. E.; Schaefer, G.; Schmidt, S.; Seward, E. M.; Sideris, S.; Tam, C.; Wang, S.; Yeap, S. K.; Yen, I.; Yin, J.; Yu, C.; Zilberleyb, I.; Heffron, T. P., Discovery of selective and noncovalent diaminopyrimidine-based inhibitors of epidermal growth factor receptor containing the T790M resistance mutation. *J Med Chem* **2014**, *57* (23): 10176-10191.
- (4) Minor, W.; Cymborowski, M.; Otwinowski, Z.; Chruszcz, M., HKL-3000: the integration of data reduction and structure solution--from diffraction images to an initial model in minutes. *Acta Crystallogr D Biol Crystallogr* **2006**, *62* (Pt 8): 859-866.
- (5) Adams, P. D.; Afonine, P. V.; Bunkoczi, G.; Chen, V. B.; Davis, I. W.; Echols, N.; Headd, J. J.; Hung, L. W.; Kapral, G. J.; Grosse-Kunstleve, R. W.; McCoy, A. J.; Moriarty, N. W.; Oeffner, R.; Read, R. J.; Richardson, D. C.; Richardson, J. S.; Terwilliger, T. C.; Zwart, P. H., PHENIX: a comprehensive Python-based system for macromolecular structure solution. *Acta Crystallogr D Biol Crystallogr* **2010**, *66* (Pt 2): 213-221.
- (6) Emsley, P.; Cowtan, K., Coot: model-building tools for molecular graphics. *Acta Crystallogr D Biol Crystallogr* **2004**, *60* (Pt 12 Pt 1): 2126-2132.
